# Supplementary material
Source: publisher figshare collection journal article supplement (https://asha.figshare.com/ndownloader/files/25303382)
Supplement: Supplementary file 1 [file 25303382]

## Sheet: final
	Supplemental material, Murray et al., "Differential Diagnosis of Childhood Apraxia of Speech Compared to Other Speech Sound Disorders: A Systematic Review," AJSLP, https://doi.org/10.1044/2020_AJSLP-20-00063
	Supplemental Material S1. Rating data.
#	Full Reference	First Author	Year	Rater	Date of rating	CAS sorting code	SSD Sorting Code	Country of Origin	Language of Participants	Language of Article	Design Overview	Type of study	Primary Focus (see Comment)	Total Number of Participants	Groups apriori?	Number of CAS Subjects	Number of control/other subjects (specify for each subgroup)	Other SSD Diagnostic Label used by authors	Criteria for diagnosis provided?	Diagnostic Criteria Label	Comorbid diagnoses present?	Comorbid diagnoses list	Inclusion Criteria (use direct quotes)	Initial Diagnostic Indicators for CAS Used by Authors (use direct quotes)	Confidence in Diagnosis for CAS (use Appendix A)	Severity for CAS	Age of CAS participants: M, (range)	Sex of CAS participants	Etiology of CAS in these participants	Initial Diagnostic Indicators for OTHER Used by Authors (see Comment)	Confidence in Diagnosis for OTHER	Severity for OTHER	Age of OTHER participants: M, (range)	Sex of OTHER participants	Etiology of OTHER	Previous speech therapy (1= yes, 0 = no, 9 = not reported)	Treatment history	Medications	Neuroimaging data	Genetic data	Genetic mutation(s) noted for each participant	SES or education	Cognitive Functioning	Language Functioning	Hearing	Vision	Replicable Participants?	Dependent Measures Code (perceptual, acoustic, kinematic)	Dependent Measures Perceptual List (use direct quotes as possible)
2	Aziz, A. A., Shohdi, S., Osman, D. M., & Habib, E. I. (2010). Childhood apraxia of speech and multiple phonological disorders in Cairo-Egyptian Arabic speaking children: language, speech, and oro-motor differences. International Journal of Pediatric Otorhinolaryngology, 74(6), 578-585.	Aziz	2010	6	2018-01-17	CAS	PI	Egypt	Arabic	English	Comparison of 3 groups of children aged 4-6 years (CAS, multiple PI and TD) in language, speech and non-speech oral performances to find signficant differences that could be used for differential diagnosis.	CC	Determining "a possible significant difference in language, speech and non-speech oral performances between children with CAS, MPD and TD that can be used for a differential diagnostic purpose".	30	1	10	10- PI; 10- TD	TD, PI	1	Davis, Jakielski, Marquardt, Developmental Apraxia of Speech: determiners of differential diagnosis, Clinical Linguistics and Phonetics 12 (1)(1998) 25–45.	1	Sequenced oral movements, expressive language impairment	Pre-school age children (4–6 years); Normal cognitive abilities (performance IQ: 80 or above); Mean length of utterance: 2 words (at least); Normal hearing abilities Normal neuromuscular abilities; No history of previous language or speech therapy.	Primary diagnosis of CAS was made on the basis of a cluster of speech and language characteristics typical of the disorder, including high frequency of consonant and syllable omissions, vowel errors, prosodic abnormalities, inconsistent errors and reduced ability to imitate non-verbal speech movements	3	0	Mean age, MPD: 4;11 Mean age, sCAS: 5; 2 Mean age, TD: 5; 1; Range 4 - 6 yrs	4-F 6-M	0	"Presence of 3 or more phonological error types will classify the child under the MPD group"	4	b (group mean)	Mean age, MPD: 4;11 , Mean age, TD: 5; 1; range 4- 6 yrs	PI: 5-F, 5-M TD: 5-F, 5-M	0	9		0	0	0	0	0	1	1	1	0	0	Perceptual	Number of correct non-verbal oral responses (rating scale), phonetic, consonant, syllabic, syllable number, syllable shape, and prosodic accuracy
1	Bahr, R. H. (2005). Differential diagnosis of severe speech disorders using speech gestures. Topics in Language Disorders, 25(3), 254-286.	Bahr	2005	1	2018-01-17	CAS	PI	USA	0	English	Comparison of 5 CAS and 5 PI all with severe reduced intelligibility, and 5 TD controls on 4 types of movement transitions (lip to tongue tip, lip to tongue blade, tongue tip to blade, and repeated gesture) in CVC words (picture naming)	CC	To assess CAS by analyzing movement gestures instead of articulatory accuracy. Children with CAS will have timing differences, or longer word durations, and different F2 slope values than the children with PI and those who are TD.	15	1	5	5- Typically developing, 5- phonological disorder, 5- CAS	phonological disorder	1	Limb and Oral Praxis Test (LOPT; adapted from Dewey, Roy, Square- Storer, & Hayden, 1988)	9	"normal hearing acuity, age-appropriate receptive language skills, intelligence within the normal range, no evidence suggesting attention disorders or emotional disturbance, no evidence suggesting a learning disability, and the absence of any known neurological insults."	"Inclusion criteria for all participants included chronological age from 48 to 84 months, normal hearing acuity, ageappropriate receptive language skills, intelligence within the normal range, no evidence suggesting attention disorders or emotional disturbance, no evidence suggesting a learning disability, and the absence of any known neurological insults. Normal hearing sensitivity was determine…	"moderate to profound (percentile ≥ 38) on the APP-R (Hodson, 1986)....Based on their performance on the Limb and Oral Praxis Test (LOPT; adapted from Dewey, Roy, Square- Storer, & Hayden, 1988), these children were placed into either the group with CAS or the group with PD. Although it is recognized that no definitive set of symptoms exists for CAS, the LOPT was used to identify children who wer…	5	All a	Mean age: 68.8 months, range 60-74 mths, not broken down by group.	2-F 3-M	0	PD: moderate to profound (percentile ≥ 38) on the APP-R (Hodson, 1986)"; On LOPT: "Children who evidenced little to no struggle or groping behaviors during oral or articulatory behaviors were placed in the phonological disorder group (mean score = 88.8%)."	4	a	not broken down by group but "comparable": 60 to 74 months, Mean: 68.8 months	PD: 1-F, 4-M TD: 3-F, 2-M	0	1	0	0	0	0	0	0	0	1	1	0	1	Perceptual, Acoustic	Number of vocal tract gesture errors, error type
	Barry, R. M. (1995). The relationship between dysarthria and verbal dyspraxia in children: A comparative study using profiling and instrumental analyses. Clinical Linguistics & Phonetics, 9(4), 277-309.	Barry	1995	6	2017-11-20	DVD	DYS	UK	English	English	Compare phonological, prosodic, and EPG profiles for 2 children with dysarthria and 2 children with persistent articulation disorder (suspected DVD)	CC	Determining differences and similarities between DVD and dysarthria	4	2	2	developmental dysarthria, phonological disorder	Dysarthria	0	mild-mod persisting articulatory disorders beyond the age of 7 years (McNutt and Hamayan,1984), which were not due to difficulties of hearing, learning disorder, or structural disorder	1	SN hearing loss, early feeding prob, early ?cond hearing loss, attention, 3/4 <average IQ	mild-mod persisting articulatory disorders beyond the age of 7 years (McNutt and Hamayan,1984), which were not due to difficulties of hearing, learning disorder, or structural disorder. Also noted general motor incoordination/ 'clumsy child syndrome' and poor diadochokinesis in 2 with DVD.	persisting articulatory disorders beyond the age of 7 years	4	b	9 years (both)	1-F 1-M	0	"presented with most of the features of childhood dysarthric speech (albeit related to very different underlying pathologies), such as: in-coordination of respiration with phonation with articulation; weak tentative articulation, and concomitant dysphonia and hypernasality (Hardy, 1983). " p 279	4	moderate-severe	9,7	1-M, 1-F	1	1		0	0	0	0	0	1	1	1	1	0	Kinematic, Perceptual	phonetic inventory phonological contrasts phonological processes variability of repetitions erratic pausing uncertain tone unit boundaries proportion incomplete, indeterminate tone units
1	Baylis, A. L., & Shriberg, L. D. (2018). Estimates of the Prevalence of Speech and Motor Speech Disorders in Youth With 22q11.2 Deletion Syndrome. American Journal of Speech-Language Pathology, 1-30. doi:https://dx.doi.org/10.1044/2018_AJSLP-18-0037	Baylis	2018	2	2019-10-01	CAS	non-CAS	USA	English	English	A prospective study of the prevalence of MSDs in children and adolescents with 22q using contemporary methods to classify MSDs. Prevalence findings are compared with findings using the SDCS in studies of three other complex neurodevelopmental disorders with overlapping phenotypes.	CS	The primary goal of this study was to obtain initial estimates of the prevalence of MSDs in children and adolescents with 22q using a recently extended and finalized classification system that includes five mutually exclusive motor speech classifications.The secondary study goal was to examine possible associations between MSD classifications and commonly studied hearing, swallowing, velopharynge…	121	0	26*	95 No MSD, Normalized speech acquisition (NSA): 12 No MSD, speech errors/persistent speech errors (SE): 5 No MSD, speech delay/persistent speech delay (SD): 10 Speech Motor Delay, NSA: 7 Speech Motor Delay, SE: 3 Speech Motor Delay, SD: 22 Chidhood Dysarthria, NSA: 9 Childhood Dysarthria, SE: 1 Childhood Dysarthria, SD: 26	* SE = Speech Errors PSE: Persistent Speech Errors SD: Speech Delay PSD: Persistent Speech Delay SMD: Speech Motor Delay CD: Childhood Dysarthria	1*	SDCS*	1	* 22q deletion syndrome Fragile X syndrome Down syndrome Galactosemia Dysarthria Hearing loss Swallowing problems Gross or fine motor difficulties Cognitive disability Learning disability Velopharyngeal deficiency	22q deletion group: "Inclusionary criteria were as follows: (a) diagnosis of 22q by fluorescence in situ hybridization testing or microarray, (b) age of 6–18 years, (c) English as the participant’s primary language, and (d) no history of permanent bilateral hearing loss." Comparison groups: "participants in these three groups were in the same approximate age range as the present participants with…	"PM <94% or PM 94%-95.9% with 2+ positive Supplemental Pause Marker Signs" (from Appendix)	4*	* S3-a S4-a S9-b S13-a	* M = 10.3 (SD = 1.7) S3-8 S4-11 S9-12 S13-10	0*	22q deletion syndrome	* Speech Motor Delay: Precision-Stability Index < 70% Dysarthria: Dysarthria Index < 80%, 2+ Dysarthria Subtype Index <70%, 1+ Dysarthria Subtype Index ≤ 10th percentile.	3	* S1-a S2-a S5-a S6-a S7-b S8-b S10-b S11-a S12-b S14-b S15-a S16-b S17-a	* M = 10.2 (SD = 3.7) S1-12 S2-9 S5-9 S6-7 S7-7 S8-13 S10-15 S11-18 S12-9 S14-12 S15-5 S16-9 S17-7	M-7 F-6	22q deletion syndrome	1		0	0	1	22q11.2 deletion syndrome Fragile X syndrome Down syndrome Galactosemia	0	1	1	1	0	2	Perceptual, Acoustic	20 measures from the Precision-Stability Index and Prosody-Voice Coding System (see Appendix B for full list)
11	Betz, S. K., & Stoel-Gammon, C. (2005). Measuring articulatory error consistency in children with developmental apraxia of speech. Clinical Linguistics & Phonetics, 19(1), 53-66.	Betz	2005	3	2018-04-03	DAS	PI	USA	English	English	Data from 3 participants (1 w DAS, 1 w PD, and 1 TD) from larger study are included. The 3 participants were used to illustrate consistency measures. Five target words were elicited in carrier phrases of varying lengths.	CC	To develop set of procedures for measuring error consistency.	3	1	1	2	functional phonological delay	2	Davis et al. 1998	1	Language disorder	"The children passed a hearing screening, lived in monolingual, English speaking homes, had normal receptive langauge abilities . . . And performed within the normal limits on the muscle strength and range-of-motion portions of a structural-functional exam (e.g., no dysarthria or craniofacial anomalies)	9	5	0	50 months	1-F	0	0	5	0	60-70 months	M-1	0	9		0	0	0	0	0	*	1	1	0	1	Perceptual	# of errors (articulation accuracy), # of total productions, # different error types, most frequently used error type
8	Bradford, A., Murdoch, B., Thompson, E., & Stokes, P. (1997). Lip and Tongue Function in Children with Developmental Speech Disorders: A Preliminary Investigation. Clinical Linguistics & Phonetics, 11(5), 363-387.	Bradford-Heit	1997	4	2018-04-30	DVD	PI	Australia	English	English	"Four children with developmental verbal dyspraxia (DVD), and three children with inconsistent deviant phonological disorder were compared to age-matched control children on measures of tongue strength and endurance and lip movement." p 363	CC	hypothesis, we addressed the following experimental questions: (1) Do school-aged children with CAS evidence comparable	23	1	4	IDPD-3, TD-16	IDPD = inconsistent deviant phonological disorder	1	Ozanne (1995): "Breakdown in each of the three levels of speech motor programming proposed by Ozanne (1995)". Gave list of errors indicative of breakdown in each level in Appendix 2.	0	n/a	"No known neurological or physical cause of the speech impairment (e.g. children with a diagnosed dysarthria or craniofacial anomalies were excluded). 2. No evidence of a sensorineural hearing loss. A11 children had pure tone thresholds within normal limits. 3. Receptive language comprehension within normal limits on at least one subtest of the TACL-R (Carrow-Woolfolk, 1985). 4. Australian Englis…	"Group assignment was carried out independently by two speech and language pathologists on the basis of phonological process usage in the connected speech sample, performance on the 25 Word Test (Dodd, 1995), the Oral and Speech Motor Control Protocol (Robbins and Klee, 1987), and the presence or absence of behaviours indicative of disturbances of phonological planning, phonetic planning, and oro…	3	0	5;1 (3;3-6;2)	2-F 2-M	0	Use of unusual phonological errors with no observable error pattern and an inconsistency score of 40% or more (Dodd, 1995). Breakdowns in all three levels of motor programming were not observed (Ozanne, 1995).	3*	0	4;7(3;6-6)	IPD: 2-M, 1-F TD: 7-F, 9-M	0	9		0	0	0	0	0	0	1	1	1	1	kinematic	n/a
7	Bradford-Heit, A., & Dodd, B. (1998). Learning new words using imitation and additional cues: Differences between children and disordered speech. Child Language Teaching and Therapy, 14(2), 159-179. doi:http://dx.doi.org/10.1191/026565998674298897	Bradford-Heit	1998	4	2018-04-30	DVD	PI	Australia	English	English	"The current investigation examined the speech imitation skills of subgroups of speech-disordered children. Its aim was to examine the effectiveness of using imitation to teach new words to three groups of speech-disordered children: those who made consistent atypical errors, those who made inconsistent errors, children diagnosed as having developmental verbal dyspraxia, and a normal age-matched …	CC	weak programs will become disrupted as indicated by acoustic changes to speech. To test the weak feedforward program	39	1	5	CPI-10, IPD-12, TD-12	CPI - inconsistent phonological disorder, IDPD-inconsistent phonological disorder	1	Ozanne (1995): "Breakdown in each of the three levels of speech motor programming proposed by Ozanne (1995)". Gave list of errors indicative of breakdown in each level in Appendix 2.	0	n/a	"No known neurological or physical cause of the speech impairment (e.g. children with dysarthria or cranio-facial anomalies were excluded). · No evidence of a sensori-neural hearing loss. Children with a history of middle ear infection were included, however, no participants were reported to have associated hearing loss at the time of assessment.Twenty-six of the participants had hearing assessme…	"Group assignment was carried out on the basis of phonological process usage in the connected speech sample, performance on the 25-word test, and the presence or absence of behaviours indicative of disturbances of phonological planning, phonetic planning, and oro-speech motor skills." p 165. "Criteria: Breakdown in each of the three levels of speech motor programming proposed by Ozanne (1995), in…	3	0	68.6 (14.0)	0	0	IFD Criteria: "Use of unusual phonological errors with no observable error pattern and an inconsistency score of 40% or more (Dodd, 1995). No evidence of breakdowns in phonetic programming (i.e. no groping, no differences between voluntary and involuntary oro-motor movement) or oro-motor speech difficulties as assessed by standardized tests (Ozanne, 1995). Consistent deviant group Criteria: Use o…	3*	0	TD-61.0 (11.0), CPI-61.6 (8.8), IFD-55.3 (10.9)	2	0	1		0	0	0	0	0	0	1	1	1	1	Perceptual	Response to cues in a non-word learning task: imitation only, stress, phonological plan, articulatory and oro-motor sequencing.
9	Bradford, A., & Dodd, B. (1996). Do All Speech-Disordered Children Have Motor Deficits? Clinical Linguistics & Phonetics, 10(2), 77-101.	Bradford-Heit	1996	4	2018-04-30	DVD	TD, SD, Consistent deviant, Inconsistent deviant	Australia	English	English	Experimental design investigating motor skills in all subgroups tested. Motor skills = OMA (Robbins and Klee) and Inconsistency test (Dodd, 1996)	CC	VOTs, vowel durations, and vowel space areas relative to those with SD and typical development (TD) in unmasked and	102	1	5	TD-51, SD-22, CD-15, ID-9	CD = consistent deviant, ID = inconsistent deviant (according to Dodd's classification system)	1	Ozanne (1995): "Breakdown in each of the three levels of speech motor programming proposed by Ozanne (1995)". Gave list of errors indicative of breakdown in each level in Appendix 2.	0	n/a	"1. No known neurological or physical cause of the speech impairment (e.g. children with dysarthria or craniofacial anomalies were excluded after oro-motor examination according to Ozanne, 1992). 2. No evidence of a sensorineural hearing loss. Children with a history of middle-ear infections were included; however, no subjects were reported to have associated hearing loss at the time of assessmen…	"Group assignment was carried out independently by two speech and language pathologists on the basis of phonological process usage in the connected speech sample, performance on the 25 Word Test (Dodd, 1995), the Oral and Speech Motor Control Protocol (Robbins and Klee, 1987), and the presence or absence of behaviours indicative of disturbances of phonological planning, phonetic planning, and oro…	3	0	4;10, (3;2-6;7)	0	0	All in appendix 2. "Speech delay group: The consistent use of at least one articulatory substitution that was not age-appropriate or the use of at least one developmental phonological process that was not age-appropriate. Inconsistency score less than 40% (Dodd, 1995). Deviant consistent group: Use of at least one deviant phonological process applied consistently so that errors were predictable a…	3	0	Age in months: TD-61.5 (SD: 4.4), CD- 56.2 (SD:8.1), ID- 50.2 (SD:10.7)	0*	0	1*		0	0	0	0	0	0	1	1	1	1	Perceptual	1. The Movements in Context task and Sequenced Oral Movements task (Ozanne, 1992) 2. The Visual-Motor Control subtest of the Bruininks-Oseretsky Test of Motor Proficiency (Bruininks, 1978). 3. receptive new-word learning, 4. elicitied production of novel words, 5. imitation of novel words,
1	Byrd, K., & Cooper, E. B. (1989). Apraxic speech characteristics in stuttering, developmentally apraxic, and normal speaking children. Journal of Fluency Disorders, 14(3), 215-229.	Byrd	1989	3	2017-11-14	DAS	non-CAS	USA	English	English	16 CWS, 15 DAS and 15 TD, between 4-9 years of age, were compared on performance on the Blakeley Screening Tests for DAS.	CC	Testing a specific screening tool to determine how well it differentiates between DAS, CWS and TD	46	1	15	31	CWS	1	Ferry et al. (1975)	1	Oral apraxia, expressive language impairment	Subjects referred from SLPs in public schools and then assigned to CWS, DAS, or TD groups. It is not clear how TD were recruited.	1. Severe artic disorder w variably unitelligible speech 2. failure to make improvement in spite of long term therapy 3. possible oral apraxia, audible/visual groping, normal hearing 4. normal receptive but not expressive language 5. absence of brain injury and obvious sensory or motor impairments.	4	0	(4-9)	0	Central neurologic deficit	CWS = Current dx of moderate or severe stuttering disorder, normal hearing, normal receptive language, not necessarily normal expressive language, absence of obvious sensory or motor impairments or hx of brain damage.	5	0	(4-9)	0	Central neurological processing deficit	0		0	0	0	0	0	0	1	1	0	1	Perceptual	Percentage of Disfluenceis on the Fluency Assessment and Treatment Plan-Children's Version (FAD-C) of the Cooper Personalized Fluency Control Therapy-Revised and the Blakeley Screening Test for DAS subtests, which included expressive language discrepancy, vowels and diphthongs, oral-motor movement, verbal sequencing, articulation, motorically complex words, transpositions, and prosody.
6	Camos, V., Fayol, M., Lacert, P., Bardi, A., & Laquiere, C. (1998). Counting in Dysphasic and Dyspraxic Children. [Le Denombrement chez des enfants dysphasiques et des enfants dyspraxiques]. A.N.A.E., 10(3), 86-91.	Camos	1998	5	13/2/2018	Dyspraxic	non-CAS	France	French	French	Comparison of production and perception of enumeration in different modalities (verbal and manual) in children with Dysphasia and children with Dyspraxia, as well as two age-matched control groups	CC	This study examines the differences in performance and competence in counting and enumeration between children with dyspraxia and children with dysphasia.	20	1	5	Dysphasia-5 TD-10	Dysphasia	1	Ajuriaguerra (reference not provided)	9	n/a	"cerebral motor impairments with constructive dyspraxia as described by Ajuriaguerra" (reference not provided)	1. "a dissociation of 20 points on the Wechsler scale (WPPSI), verbal and performance"; 2. "difficulty in building or reproducing models involving spatial relationships"	5	0	6;0 (5;5-6;4)	2-F 3-M	0	0	5	0	Dysphasia: 8;1 (7;0-10;0) Controls*: 7;4 (5;9-10;4)	Dysphasia: 5-M Controls*: 8-M, 2-F	0	9		0	0	0	0	0	0	0	0	0	0	Perceptual	Production: pointing a sequence of numbers (stickers), verbal enunciation of a number sequence, enumeration of a homogeneous set, enumeration of a set with visual interferents Perception/processing: judment of correct/incorrect actions by the experimenter; pointing a set of numbers, verbal enunciation of a number sequence, judging whether number of elements of a set identified correct by experime…
6	Djordjevic, V., & Golubovic, S. (2012). Characteristics of fundamental laryngeal voice (f0) in developmental verbal apraxia. HealthMED, 6(6), 2140-2146.	Djordjevic	2012	4	2018-04-30	DAS	LI, PD	Serbia	Not stated	English	Comparative study of laryngeal voice.	CC	"The aim of this study was to determine the basic characteristics of fundamental laryngeal voice (f0) for DVA" p 2148	45	1	15	LI-15, PD-15	Developmental dysphasia (LI).	0	None provided	9	n/a	None	None	5	0	(4-5 years)	0	0	None provided	5	0	(4-5 years)	0	0	0		0	0	0	0	0	0	0	0	0	0	Perceptual	Assessment of basic laryngeal voice laryngogram: ratings of pitch and tension on a 6 point scale.
10	Hayden, D. A. (1994). Differential diagnosis of motor speech dysfunction in children. Clinics in communication disorders, 4(2), 119-141.	Hayden	1994	4	2018-04-30	AOS	DYS, PD	USA	English	English	Case descriptions of case history and response to assessment including Verbal Motor Production Assessment for Children (VMPAC) testing.	other	masked speech, and (2) Do children with CAS, SD, and TD evidence an effect of noise-masking on VOT, vowel durations,	4	0	1	.	DYS - dysarthria. PD- phonological disorder, overall very poor motor skills	0	n/a	1	language disorder	n/a	"suspected "apraxia of speech" was queried in previous reports"	4	0	4;10	1-M	0	n/a	4	0	GM-4;9, DYS-6;4, PD- 5;5	M-2, F-1	GM and DYS "hypotonia", "seizures"	1		0	0	0	0	0	1	1	1	1	1	Perceptual	VMPAC
1	Iuzzini, J. (2012). Inconsistency of speech in children with Childhood Apraxia of Speech, phonological disorders, and typical speech. Dissertation Abstracts International: Section B: The Sciences and Engineering, 73(7-B(E)), No Pagination Specified.	Iuzzini	2013	4	2018-05-20	CAS	PD	USA	English	English	Comparison of 3 groups of CAS, PD and TD on measures of inconsistency and VOT.	CC	Determining age related differences in inconsistency and VOT, if inconsistency and VOT measures were similar and if the measures help classify the groups.	58	1	14	PD-15, TD-29	PD = phonological impairment	1	GFTA-2 SS and CSIP > 40%	0	n/a		GFTA-2 SS and CSIP > 40%	4	moderate-severe	51.93(9.83)	0	0	GFTA-2 SS and CSIP < 40%	4	moderate-severe	53.79(9.28)	0	0	1		0	0	0	0	0	1	1	1	0	0	Perceptual	segmental and lexical inconsistency: WIS, CSIP, ISP, ISP/PCC, ISP-A
4	Iuzzini-Seigel, J., Hogan, T. P., Guarino, A. J., & Green, J. R. (2015). Reliance on auditory feedback in children with childhood apraxia of speech. Journal of Communication Disorders, 54, 32-42. doi:http://dx.doi.org/10.1016/j.jcomdis.2015.01.002	Iuzzini-Seigel	2015	4	2018-04-30	CAS	SD, TD	USA	English	English	"used an auditory masking paradigm to determine the effect of attenuating auditory feedback on speech in 30 children: 9 with with CAS, 10 with SD and 11 with TD"	CC	"[Testing] the integrity of speech feedforward programs in children with CAS using an auditory masking paradigm" Tested VOTs, vowel durations, and vowel space areas relative to those with SD and typical development (TD) in unmasked and masked conditions.	30	1	9	SD-10, TD-11	SD, TD	1	"At least 5 out of 11 CAS characteristics (adapted from Shriberg, Potter, & Strand, 2011) during completion of the GFTA-2." p 34. See Appendix A.	0	n/a	"All participants passed a bilateral pure-tone hearing screening at 20 dB for the octave frequencies between 500 and 4000 Hz (ASHA, 1997). The evaluation included standardized and customized speech, language, and cognitive assessments. See Table 1 for a summary of demographics and test scores by group. All participants were required to have normal cognition based on a standard score of 75 or high…	See Appendix A.	1	moderate-severe	126 (42)	0	0	TD: "Participants were assigned to the typically developing group (TD; n = 11) if they met the criteria listed above, scored higher than the 16th percentile on the Goldman Fristoe Test of Articulation-2nn Edition (GFTA-2; Goldman & Fristoe, 2000), and reported no history of speech or language treatment" p 34. SD: "Children were assigned to the SD group (n = 10) if they produced 4 or fewer CAS cha…	TD: 1, SD: 3	SD: moderate-severe	TD - 134 (46), SD - 102 (14)	0	0	CAS: 1, SD: 1, TD: 0		0	0	0	0	0	1	1	1	1	1	Acoustic	n/a
11	Iuzzini-Seigel, Jenya, et al. "Speech Inconsistency in Children With Childhood Apraxia of Speech, Language Impairment, and Speech Delay: Depends on the Stimuli." Journal of Speech, Language, and Hearing Research, vol. 60, no. 5, 2017, p. 1194+.	Iuzzini-Seigel	2017	4	2018-05-20	CAS	CAS, SD, LI, TD	USA	English	English	Compared children with CAS, CAS+, SD, LI and TD to determine differences in inconsistency measures.	CC	"The current research sought to determine (a) if speech inconsistency is a core feature of childhood apraxia of speech (CAS) or if it is driven by comorbid language impairment that affects a large subset of children with CAS and (b) if speech inconsistency is a sensitive and specific diagnostic marker that can differentiate between CAS and speech delay." p 1195	48	1	10	(CAS+LI - 10), SD - 10, LI - 9, TD - 9	LI = language impairment, SD = speech delay, TD = typically developing	1	"At least 5 out of 11 CAS characteristics (adapted from Shriberg, Potter, & Strand, 2011) during completion of the GFTA-2." p 34. See Appendix A.	1	language disorder	"All participants passed a bilateral pure-tone hearing screening (ASHA, 1997) and completed a series of assessments that included the Goldman-Fristoe Test of Articulation–Second Edition (GFTA-2; Goldman & Fristoe, 2000), the Clinical Evaluation of Language Fundamentals–Fourth Edition (CELF; Semel, Wiig, & Secord, 2003) or Clinical Evaluation of Language Fundamentals–Preschool Second Edition (CELF…	"Participants were assigned to the CAS group (n = 20) based on confirmation by two blinded raters with prior experience assessing children with CAS using the criteria below." "Participants in the CAS group were required to have a GFTA-2 percentile < 16 and evidence ≥ 5/11 CAS features using a well-established protocol in our laboratories (Centanni et al., 2015; Iuzzini-Seigel, Hogan, Guarino, & G…	1	0	9;9 (SD=3.8 years)	0	0	SD: "GFTA-2 percentile < 16, < 5/11 CAS features, and no previous CAS diagnosis or history of treatment for CAS" LI: normal performance on the articulation test (GFTA-2 percentile ≥ 16), fewer than five CAS features, and evidence of LI based on a CELF or CELF-P core language standard score of 85 or less. TD: GFTA-2 percentile ≥ 16, normal language, and no history of speech or language treatment.	SD: 3 LI: 1 TD: 1	0	CAS+LI-120 (28), TD-140 (43), LI-122(12), SD-102 (14)	0	0	1		0	0	0	0	0	1	1	1	0	1	Perceptual	(a) Token-to token inconsistency: word level, (b) Token-to token inconsistency: sentence level, (c) Inconsistency Severity Percentage
3	Keske-Soares, M., Uberti, L. B., Gubiani, M. B., Gubiani, M. B., Ceron, M. I., & Pagliarin, K. C. (2018). Performance of children with speech sound disorders in the dynamic evaluation of motor speech skills. CODAS, 30(2). doi:10.1590/2317-1782/20182017037	Keske-Soares	2018	4	2018-02-20	CAS	PI	Brazil	Portuguese	English	Comparison of children with CS, PI or TD's speech accuracy and consistency using the DEMSS-BR. Differences were compared statistically.	CC	To determine how the DEMSS-BR can differentiate children with CAS, PI or TD.	18	1	6	PI-6, TD-6	Phoological disorder (PD) and Typical speech acquisition (TSA)	0	"The aspects of orofacial motricity were assessed through the Orofacial Myofunctional Evaluation with Scores (OMES)(20) to verify the characteristics of the phonoarticulatory organs and functions of the stomatognathic system. The Auditory Vocabulary Test(21) was used to verify comprehensive language and the Child Naming Test(22) was applied to examine expressive language. Finally, the Assessment …	9	n/a	Study participants were 18 children of both genders aged 4 years and 6 months to 5 years and 8 month... From the group of children with childhood apraxia of speech (CAS), the other two groups were matched for age....Participants were included in the study after undergoing a series of assessments in order to discard and/or classify possible organic impairments and language delays.In order to disca…	No indicators provided.	5	0	4;6 (4;11-5;08)	1-F 5-M	0	Not reported	5	0	4;7 (4;05-5;08)	PD: 4-M, 2-F TSA: 2-F, 4-M	0	9	0	0	0	0	0	0	0	0	1	0	0	Perceptual	"Descriptive analysis was conducted on the subscores of the DEMSS-BR for each child, as well as for the variables overall articulatory accuracy and consistency for the groups." p 3
4	Lewis, B. A., Freebairn, L. A., Hansen, A. J., lyengar, S. K., & Taylor, H. (2004). School-age follow-up of children with childhood apraxia of speech. Language, Speech, and Hearing Services in Schools, 35(2), 122-140.	Lewis	2004	1	2018-01-18	CAS	SSD	USA	English	English	Ten children who were clinically diagnosed with CAS completed a longitudinal study from preschool until school age. These children were compared to two other groups, group of children with SSD and a group of children with a SSD and a language disorder. These children were analyzed in articulation, diadochokinetic rates, language, reading, and spelling.	CC	To evaluate the difference in language, speech and writing learning outcomes in children with CAS and children with other SSD and language disorders.	39	1	10	29	Isolated speech sound dis (SSD) and combined speech-language disorder (SL)	1	Multiple sets of criteria from others (Hall et al., 1993; Ozanne, 1995; Shriberg, Aram, & Kwiatkowski, 1997a, 1997b; Stackhouse, 1992; Velleman & Strand, 1994)	0	n/a	normal hearing acuity and fewer than six reported episodes of otitis media before age 3, (b) absence of neurological disorders, and (c) normal intelligence defined as a Performance IQ of 80 or above on the Wechsler Intelligence Scale for Children–Third Edition	"Must have exhibited more than four characteristics of CAS. nondevelopmental processes, metathetic errors, prolongations, and addition errors, in the children’s connected speech samples. Because children with CAS have limited conversational speech, comprised largely of unintelligible, single-syllable utterances, the Khan-Lewis Phonological Process Analysis (KLPA; Khan & Lewis, 1986) was also used…	5	TFS of 2 SD below the mean on the Oral and Speech Motor Control Protocol.	4-6 and then 8-10	3-F 7-M	0	9	1	1.25 SD or more on the GFTA	Preschool to school age.	0	0	9	0	0	0	0	0	0	1	1	1	0	1	Perceptual	Perceptual: GFTA Sounds in Words for I, M, F word positions, and blends plus KLPA measures on GFTA (i.e. age-adjusted percentile score and presence or absence of nondevelopmental phonological processes and syllable errors); Multisyllabic Word Repetition task (MWR; Catts, 1986) and Nonsense Word Repetition task (NWR; Kamhi & Catts, 1986) for phoneme accuracy (PPC), phonological processes and sylla…
11	Lewis, B. A., Freebairn, L. A., Hansen, A., Taylor, H., Iyengar, S., & Shriberg, L. D. (2004). Family pedigrees of children with suspected childhood apraxia of speech. Journal of Communication Disorders, 37(2), 157-175. doi:http://dx.doi.org/10.1016/j.jcomdis.2003.08.003	Lewis	2004	1	2018-04-27	CAS	SSD	USA	English	English	Family pedegrees constructed for CAS and SSD children	CS	1, do SSDs/LDs aggrigate in families; 2, does aggrigation for SSd differ to that for CAS; 3, does aggrigation differ for Ms and Fs with CAS; 4, do children with CAS differ from those with other SSDs in terms of SSD/ LD severity	115	1	22	S: 51; SL: 42	S=SSD alone; SL=SSD+LD	1	GFTA-2; Robbins & Klee OMA; TOLD-P2	1	some with LD	1, normal hearing; 2, absence of history of neurological disorders; 3, normal intelligence- >80 on WISC-III/WIPPSI-R	All children initially referred by community SLP with "suspected CAS" diagnosis. Then CAS dx for inclusion was based on: (1) severely restricted phonemic repertoire inc. errors of class, place, manner, voicing and vowel errors (i.e. <5% on GFTA-2; presence of 3 or more phon. processing errors in mod to sev range; overall rating of 4 (sev) on KLPA; (2) reduced didochokinetic rate, defined by TFS o…	4	b (mod), c (sev)	3-6 years	6-F 16-M	0	mod-severe SSD defined by 1SD or more on GFTA-2 prior to SP intervention; 3 or more phonological error types as defined by KLPA; normal peripheral speech mechanism on R&K OMA; some also have LD defined by scaled score of <8 on two or more subtests of TOLD-P:2	1	b	SSD: 3-6; SSD+LD: 3-6	SSD: 29M, 22F; SSD+LD: 28M, 14F	0	9		0	0	0	0	1	1	1	1	0	1	Perceptual	1) developmental history (e.g. age of first wrd/sentence, physical devt, med/neuro hx, progress in speech tx), + formal testing of 2) speech development (GFTA; KLPA; PCC; presence in conversation of inconsistent, metathetic, or prosodic errors; MWT Catts 1986), 3) oral motor (R&Klee), 4) language (TOLD-P:2).
10	Lewis, B. A., Avrich, A. A., Freebairn, L. A., Taylor, H., Iyengar, S. K., & Stein, C. M. (2011). Subtyping children with speech sound disorders by endophenotypes. Topics in Language Disorders, 31(2), 112-127. doi:http://dx.doi.org/10.1097/TLD.0b013e318217b5dd	Lewis	2011	1	2018-04-27	CAS	SSD	USA	English	English	Children enrolled in a large longitudinal genetic study of SSDs (Children with SSD and their siblings) were tested in early childhood for performance on the 5 listed endophenotypes - oral motor skills, phon memory, phon awareness, vocab, speeded naming	CS	Examines associations of 5 endophenotypes (Oral motor skills, Phonological memory, phonological awareness, vocabulary and speed naming) against 3 clinical criteria for classifying SSD: severity, subtype (SSD, SSD+Lang, CAS)and +/-co-morbid reading disorder	237	1	42	Other SSD: 126; Non-SSD: 69*	SSD; SSD with LD; SSD with RD	1	ASHA 2007	1	ReadDis; LangDis	Normal hearing; absence of history of neurological disorders or developmental delay other than speech and language, as reported by parent; normal performance IQ >80 on WISC-III / WPPSI-R	None given beyond parent report of CAS diagnosis through a questionnaire and structured interview	5	PCC-R: 90% moderate, 5% mild-mod, 5% recovered	0 (4-7 years)	0	0	None given except for PCC-R severity	5	no-SSD to moderate	4-7 years	0	0	1*		0	0	0	0	0	1	1	1	0	1	Perceptual	PCC-R plus Performance on tests on the 5 endophenotypes: Oromotor - DDK rate (AMR, SMR) on Robbins & Klee/Fletcher time by count; Phon awareness - elision and sound blending subtests of CTOPP; Phon STM - digit span of WISC-III, sentence imitation subtest of TOLD-P:3, repetition of multisyllabic real and nonsense words (Catts 1986); Vocab -EOWPVT-R and PPVT-III; Speeded naming - Rapid Naming of Co…
2	Lewis, B. A., Freebairn, L., Tag, J., Benchek, P., Morris, N. J., Iyengar, S. K., . . . Stein, C. M. (2018). Heritability and longitudinal outcomes of spelling skills in individuals with histories of early speech and language disorders. Learning and Individual Differences, 65, 1-11. doi:10.1016/j.lindif.2018.05.001	Lewis	2018	2	2019-10-01	CAS	SSD	USA	English	English	"children were originally recruited as part of a longitudinal study that aimed to identify predictors of outcomes for children with different subtypes of early SSD. Children were divided into three groups including SSD-only, SSD with LI but not CAS (SSD+LI/No CAS), and CAS with LI (CAS+LI). A group without histories of SSD or LI (No SSD/LI) was also assessed. Group differences in spelling and ass…	CS	Our primary aims were to determine if spelling difficulties were evident at both ages, to explore potential age differences in the skills associated with spelling, and to identify differences in spelling outcomes among clinical subtypes of SSD.	665	1*	63* 13*	602* No SSD/LI: 255 (146 middle childhood, 109 adolescents) SSD-only: 177 (111 middle childhood, 66 adolescents) SSD+LI: 170 (107 middle childhood, 63 adolescents) 118 No SSD/LI: 44 SSD-only: 39 SSD+LI: 35	SSD LI	1	List of features (Hall, Jordan, & Robin, 1993; Stackhouse, 1982; Velleman & Strand, 1994)	1	Language impairment	1) moderate to severe expressive SSD as defined by a score of 1 SD or greater below the mean on the Goldman-Fristoe Test of Articulation Sounds-in-Words subtest (Goldman & Fristoe, 1986; Goldman & Fristoe, 2000) and by commission of at least 3 phonological error types as identified by the Khan-Lewis Phonological Analysis (KLPA; Khan & Lewis, 1986, 2002), with speech sound differences due to diale…	The diagnosis of CAS was based initially on a provisional diagnosis by the child's speech language pathologist. The children were then screened by members of the research team for a speech production disorder involving deficits in motor programming. A final diagnosis of CAS required that the child demonstrate at least four commonly reported characteristics of CAS suggestive of an oral-motor progr…	4*	0	FULL SAMPLE: middle childhood: 9.4 (1.3) adolescents: 15.1 (1.8) LONGITUDINAL SAMPLE: middle childhood: 9.5 (1.4) adolescents: 16.1 (1.5)	FULL SAMPLE: F-16 (middle childhood: 10; adolescents: 6) M-47 (middle childhood: 30; adolescents: 17) LONGITUDINAL SAMPLE: F-2 M-11	0	The SSD-only group and the SSD+LI group did not present with CAS. Children with SSD-only obtained scores>1.25 standard deviations below the mean on all subtests of the Test of Language Development—Primary:2 (TOLD-P:2, Newcomer & Hammill, 1988) or the Test of Language Development—Primary:3 (TOLD-P:3, Newcomer & Hammill, 1997). Children with SSD+LI met the criteria for language impairment adapted f…	1	0	FULL SAMPLE: middle childhood No SSD/LI: 9.4 (1.4) SSD-only: 9.2 (1.4) SSD+LI: 9.6 (1.4) adolescents: No SSD/LI: 14.4 (1.8) SSD-only: 14.6 (1.7) SSD+LI: 14.4 (1.5) LONGITUDINAL SAMPLE: middle childhood No SSD/LI: 9.2 (1.1) SSD-only: 9.1 (1.5) SSD+LI: 9.2 (1.3) adolescents: No SSD/LI: 15.0 (1.7) SSD-only: 14.8 (1.6) SSD+LI: 14.7 (1.5)	FULL SAMPLE: No SSD/LI: M-67, F-79 (middle childhood) & M-56, F-53 (adolescents) SSD-only: M-63, F-48 (middle childhood) & M-44, F-22 (adolescents) SSD+LI: M-73, F-34 (middle childhood) & M-40, F-23 (adolescents) LONGITUDINAL SAMPLE: No SSD/LI: M-20, F-24 SSD-only: M-23, F-16 SSD+LI: M-22, F13	0	1*		0	0	0	0	1	1	1	1	0	0*	Perceptual	Phonological awareness (Elision subtest "from pre-publication version of the Comprehensive Test of Phonological Processing and later with the published version (CTOPP, Wagner, Torgesen, & Rashotte, 1999).") Rapid Automatized Naming of colors (Denckla & Rudel, 1976) Reading Decoding (Word Identification and Word Attack subtests of the Woodcock Reading Mastery Tests—Revised (Woodcock, 1987)). Spell…
9	Maas, E., & Mailend, M. L. (2017). Fricative contrast and coarticulation in children with and without speech sound disorders. American Journal of Speech-Language Pathology, 26(2Special Issue), 649-663. doi:10.1044/2017_AJSLP-16-0110	Maas	2017	1	2018-04-27	CAS	SSD	USA	English	English	In a cross-sectional design, 10 adults, 17 typically developing children, and 11 children with SSD repeated carrier phrases with novel words with fricatives (/s/, /ʃ/). Group analyses compared adults and typically developing children; individual children with SSD were compared to their respective typically developing peers.	CC	The primary aim of the current study was to explore the potential utility of two acoustically based measures for distinguishing different types of SSD. A secondary aim was to advance our understanding of typical speech motor development with respect to segmental contrast and anticipatory coarticulation.	38	1	5*	10 Adults (F); 17 TD; SSD (minus CAS participants): 6	PD, AD	1	ASHA 2007	0	n/a	(a) adequate oral structure and function, on the basis of an oral mechanism exam (Robbins & Klee, 1987); (b) normal or near-normal language skills as determined by the Clinical Evaluation of Language Fundamentals Screening Test (CELF; Semel, Wiig, & Secord, 2004)1; and (c) receptive vocabulary within normal limits as determined by standard scores ≥ 85 on the Peabody Picture Vocabulary Test–Fourth…	inconsistent errors on vowels and consonants, difficulty transi- tioning between speech sounds, and/or abnormal prosody.	1	0	S300: 5,6; S304: 5,7: S316: 6,10; S317: 6,6; S320: 6,8	2-F 3-M	0	Children in the SSD group demonstrated speech skills below the normal range, based on a percentile rank of < 16 on the GFTA-2 and/or clinical judgment based on all speaking tasks conducted as part of the assessment, including conversational speech.2 Children ranged in severity and nature of their speech sound error profile, and represented a relatively heterogeneous group. For this reason, we pre…	1	0	S104: 6,7; S107: 6,2; S319: 6,1; S201: 8,1; S307: 10,9; S312: 10,11*	Other SSDs: 0-F, 6-M TD children: 9-F, 8-M adults: 10-F, 0-M	0	0		0	0	0	0	0	1	1	1	0	1	Acoustic	n/a
10	Maassen, B. (2004). Speech output disorders. In Classification of developmental language disorders: Theoretical issues and clinical implications (pp. 175-190). Mahwah, NJ: Lawrence Erlbaum Associates Publishers; US.	Maassen	2004	3	2018-04-26	DAS	DYS	0	0	English	Two studies were reported. In study 1, words and pseudowords were elicited by imitation and performance was compared between children with DAS and those with normal lang and dysarthria. In study two, words were elicited by picture naming. Children with DAS were compared with TD and SLI groups	CC	To compare speech of children with DAS, DYS, TD, and SLI. Aim was to contribute to development of artic test	Study 1: 31; Study 2: 70	1	Study 1: 11; Study 2: 18	Study 1: DysA (Spas Dys) 9, NLA (nml language) 11; Study 2: SLI 23, NLA 29	Dysarthria, SLI	1	Hall, Jordan, & Robin, 1993	1	0	Presence of multiple artic errors, episodes of low intelligilibility, difficulty w complex sound sequences and groping, inconsistent speech output, resistance to therapy, normal hearing, normal IQ, and normal receptive language.	Presence of multiple artic errors, episodes of low intelligilibility, difficulty w complex sound sequences and groping, inconsistent speech output, resistance to therapy and other criteria specified by Hall et al. 1993	4	0	Study 1: 6;3-7;9 and Study 2: 4;11-6;10	0	0	"Most important criteria for Dysarthria were quadriplegia due to cerebral palsy, slow speech rate, imprecise consonant production, hypernasality, and low and monotonous pitch."	3	0	DysA=64-123 months	0	Cerebral Palsy	0		0	0	0	0	0	1	1	1	0	1	Perceptual, Acoustic	Frequency count of error types and features
4	McNeill, B., Gillon, G., & Dodd, B. (2009). Phonological awareness and early reading development in childhood apraxia of speech (CAS). International Journal of Language & Communication Disorders, 44(2), 175-192.	McNeill	2009	3	2017-11-17	CAS	PI	New Zealand	English	English	12 children (4-8 years old) with CAS, 12 with inconsistent speech disorder, and 12 with TD were compared on phonological awareness and early reading development.	CC	To compare phonological awareness and early reading ability in children with CAS, inconsistent speech disorder and TD.	36	1	12	24	Inconsistent speech disorder	1	Assessment battery based on Ozanne (2005), Davis et al. (1998)	1	They didn't administer receptive and expressive language batteries, but the phonological awareness, letter knowledge and word reading tasks revealed that children with CAS often performed below the normal limit	Children who were 4-8 years age with suspected CAS and no history of sensory, cognitive, or neurological impairment. Standard score below 1.5 SD of mean on BBTOP, 40% or greater on DEAP and PPVT score of 77 or higher.	Children with CAS also had SS below 8 on the oromotor subtests of DEAP or SS of below 8 on the DDK and presence of groping during speech.	5	0	68.5 months (4-8)	0	Speech motor planning disorder	SS of 8 or above on DEAP oromotor and DDK subtests and no evidence of groping	5	0	61.2 months (4-8 years)	F-9; M-3	0	0		0	0	0	0	1	1 (PPVT is a correlate for verbal IQ)	1	0	0	1	Perceptual	Letter-sound knowledge, phonological representation, word decoding, phonologcal awareness, nonword reading
14	Mei, C., Fedorenko, E., Amor, D. J., Boys, A., Hoeflin, C., Carew, P., ... & Morgan, A. T. (2018). Deep phenotyping of speech and language skills in individuals with 16p11. 2 deletion. European Journal of Human Genetics, 1.	Mei	2018	5	2019-06-07	CAS	non-CAS	Australia & USA	English	English	characterize the communication impairment and determine the prevalence of CAS in a sample with the genetic condition 16p11.2 deletion	CS	Our aims were threefold: (1) Examine the prevalence of CAS in a large unselected cohort of individuals with 16p11.2 deletion, using a prospectively determined assessment battery; (2) Characterize specific co-occurring speech production and language diagnoses to provide a comprehensive study of the communication phenotype; and (3) Examine the relationship between CAS and other behaviors of languag…	55 (47 children; 8 adults)	0	34 children; 4 adults	0	AD;PD;dysarthria	1	The three consensus-based features listed in the ASHA Technical Report (2007)	1	dysarthria; AD; PD; structural deficits ("articulation and phonological speech errors were also common, present in 43% (19/44) and 82% (36/44) of children, respectively. Of the 19 children with articulation errors (e.g., interdental or lateral fricatives, labiodental production of bilabials), 11 had structural deficits likely to be causing the phonetic distortion (e.g., malocclusion, submucous cl…	"16p11.2 recurrent microdeletion (~600-kb including DOC2A and TBX6) and an age between 2;11 and 18;0 years"	diagnostic criteria were adapted from Murray et al. [23, 24] based on three American Speech and Hearing Association consensus-based criteria [9], as in our previous work [2]: (1) inconsistent production of the same word; (2) lengthened and disrupted coarticulatory transitions; and 3) prosodic errors (see Table 1).	1	Children demonstrated a range of PCC severity ratings: mild (51%, 22/43), mild-moderate (33%, 14/43), moderate-severe (9%, 4/43), and severe (2%, 1/43). PCC data were not available for one child. PCC speech severity ratings were mild in all impaired adult cases (71%, 5/7)	0 (age range full sample: 2;11 - 18;0)	0*	genetic condition; 16p11.2 recurrent microdeletion	"Articulation deficits were evaluated using the Goldman-Fristoe Test of Articulation-2 (GFTA-2) [19]. GFTA-2 responses were analyzed for phonological processes and compared to normative data [20] to identify disordered, delayed or age appropriate processes (see supplemental material Table S1 for definitions). This distinction is essential given that disordered phonology (compared to delayed) is a…	1	0	0 (age range full sample: 2;11 - 18;0)	0 (gender general sample: 24-F; 31-M)	genetic condition; 16p11.2 recurrent microdeletion	1		0	0	1	16p11.2 recurrent microdeletion (~600-kb including DOC2A and TBX6) (all participants)	0	1	1	1	1	0	Perceptual	Inconsistent production was examined using the standardized Inconsistency subtest of the Diagnostic Evaluation of Articulation and Phonology (DEAP) [20]. Prosodic, syllable and sound sequencing errors typifying disrupted co-articulatory transitions were analyzed using the Single-Word Test of Polysyllables [24, 25]. Overall speech accuracy ratings of Percent Consonants Correct (PCC) and Percent Vo…
13	Morgan, A. T., van Haaften, L., Hulst, K., Edley, C., Mei, C., Tan, T. Y., ... & Koolen, D. A. (2018). Early speech development in Koolen de Vries syndrome limited by oral praxis and hypotonia. European Journal of Human Genetics, 26(1), 75.	Morgan	2018	5	2019-06-07	CAS	non-CAS	14 US, 9 AUstralia, 4 Netherlands, 1 New Zealand, 1 Brazil	English	English	characterize the communication deficits in Koolen de Vries syndrome	CS	"examine the communication phenotype associated with Koolen de Vries syndrome"	29	0	24	0	dysarthria; stuttering; Delayed or atypical phonological speech sound processes;	2	Fedorenko E, Morgan A, Murray E, et al. A highly penetrant form of childhood apraxia of speech due to deletion of 16p11.2. Eur J Hum Genet 2016;24:302–6.	1	dysfluency/stuttering (n = 3/18; 17%) dysarthria (n = 14/15; 93%) commensurate expressive and receptive language abilities (n = 23/29; 79%) cleft lip and palate (ID 15, 18, 26). Hypodontia (n = 7/7; 100%), macroglossia (n = 5/12; 42%) and malocclusion (cross-bite or underbite) (n = 8/13; 62%) were noted in a subset of participants. High arch palate was reported in half of the group (n = 8/16, 50%…	"confirmed diagnosis of KdVS (chromosome 17q21.31 microdeletion or KANSL1 variants) and aged ≥1;0 year "	In method section: "Phonological process analysis was conducted on the GFTA-2 and CAI productions to differentially diagnose articulation (movement plan and motor production of the sound) ability and phonological performance (a child’s understanding of sound rules of their language) [15]. Where children had sufficient speech, a 5-min conversational sample was obtained, and analysed using pre-dete…	3	0	0 (age range full sample: 1;0 - 25;11)	0*	genetic condition; KdVS (chromosome 17q21.31 microdeletion or KANSL1 variants)	In method section not mentioned. From results section: "dysfluency (stuttering), manifesting as syllable, word or phrase level repetitions ... dysarthria, typically characterised by low pitch, hypernasality, monotonous, monoloud and flaccid, slow speech"	5	0	0 (age range full sample: 1;0 - 25;11)	0 (gender general sample: 17-F; 12-M)	genetic condition; KdVS (chromosome 17q21.31 microdeletion or KANSL1 variants)	1		0	0	≈600 kb deletion at 17q21.31 (n=25) or nonsense KANSL1 variants (n=4)	1	0	1	1	1	1	1	Perceptual	Outcome meqasures not detailed: "The standardised Goldman–Fristoe Test of Articulation (sounds-in-words subtest and stimulability probe) (GFTA-2) [13] was administered in English-speaking children with sufficient verbal production at the single world level. The Dutch-normed computer articulation instrument (CAI) was administered [14] to Dutch children. Phonological process analysis was conducted …
5	Moss, A., & Grigos, M. I. (2012). Interarticulatory coordination of the lips and jaw in childhood apraxia of speech. Journal of Medical Speech-Language Pathology, 20(4), 127-132.	Moss	2012	3	2018-02-14	CAS	SD	USA	English	English	Three groups of children were included: children with CAS; children with a speech sound disorder involving articulation, phonological errors, or both (the SD group); and typically developing (TD) children. A facial motion capture system was used to track upper lip, lower lip, and jaw movement during a naming task in which stimuli varied by word length.	CC	To determine whether coordination between lips and jaw during speech production is impaired in children with CAS, SSD, and TD	18	1	6	SD -6; TD-6	Phonological errors	1	0	9		Children with CAS, SD, or TD between 3-7 years age. Normal hearing, average performance on Columbia Mental Maturity Scale and the Receptive subtest of TELD required.	Children were diagnosed with CAS if they had prosodic errors, inconsistent vowel and consonant errors, and difficulty using sounds produced in isolation in sequences. Other indicators of CAS included metathesis; articulatory groping; reduced phonetic inventory; and excessive distortions, omissions, substitutions, and additions.	3	0	4.96 years (3-7)	0	0	0	4	0	SD and TD M = 5 (range 3-7)	0	0	0		0	0	0	0	0	1	1 (normal receptive is noted)	1	0	0	kinematic	n/a
EXAMPLE	Munson, B., Bjorum, E. M., & Windsor, J. (2003). Acoustic and perceptual correlates of stress in nonwords produced by children with suspected developmental apraxia of speech and children with phonological disorder. Journal of Speech, Language, and Hearing Research, 46, 189-202.	Munson	2003	6	2017-09-05	DAS	PI	USA	English	English	5 kids with sDAS and PI were compared on perceptual accuracy of repeating nonwords with known sounds, acoustic measures and perceptual listener judgment to determine differences between the groups.	CC	Test hypothesis that accuracy in production of lexical stress distinguishes children with CAS from children with PD usinfg perceptual and acoustic measures.	10	1	5	5	PD	1	Checklist adapted from Davis et al. (1998) and Skinder et al. (1999)	1	expressive language disorder (2/5 children with CAS)	Not specified. Both groups dewcribed as having speech errors beyond what would be expected for children of their age	Not sure how or whether this was used to Dx CAS, but compared to PD, CAS had: 1. decreased quantity of spontaneous speech, with apparent awareness that speaking was difficult. 2. inconsistent errors, with evidence of decreasing accuracy across trials. 3. facial groping and false starts during speaking. 4. preponderance of simple syllable shapes. 5. Misplaced stress in multisyllabic words. Additio…	3	S1-b S2-a S3-a S4-b S5-b	S1-8;10 S2-4;8 S3-3;9 S4-5;9 S5-3;11	2-F 3-M	0	Phonological Disorder = Expressive language disorder and errors on GFTA-2.	4	S6- b S7- b S8- a S9- b S10-b	S6- 4;9 S7- 4;5 S8- 3;11 S9- 3;11 S10-4;6	3-M 2-F	0	0			0	0	0	0	0*	1	0*	0	0	Perceptual, Acoustic	Stress patterns - broad transcription, trained listener judgments
4	Murray, E., Mc Cabe, P., Heard, R., & Ballard, K. J. (2015). Differential diagnosis of children with suspected childhood apraxia of speech. Journal of Speech, Language, and Hearing Research, 58(1), 43-60. doi:10.1044/2014_JSLHR-S-12-0358	Murray	2015	5	15/12/17	CAS	non-CAS	Australia	English	English	This diagnostic study was conducted in three phases to address the research aim. First, children were recruited and assessed according to the protocol below. Second, the first two authors (EM and PM) judged presence or absence of CAS by listening to speech samples from the assessment protocol and completing two published checklists of CAS characteristics. Third, the first author (EM) and independ…	CS	to use objective statistical methods to identify one or more quantitative measures of speech that reproduce the expert classification of children as having CAS or not.	47	1	CAS-28 4-CAS+	15	non-CAS	1	(a) the three consensus-based features listed in the ASHA Technical Report (2007) and (b) any four of the 10 features in Strand’s 10-point checklist (Shriberg, Potter, et al., 2009)	CAS: 13 expressive language disorder 4 CAS+: 2 expressive language disorder; 2 expressive+receptive language disorder non-CAS:	dysarthria + receptive and/or expressive language disorder	(a) a clinical diagnosis of suspected CAS by a community-based SLP, (b) age between 4 and 12 years, (c) no previously identified language comprehension difficulty, (d) normal or adjusted-to-normal hearing and vision, (e) native English speaker, and (f ) no other developmental diagnoses not associated with CAS (e.g., intellectual disability, autism, cerebral palsy).	(a) the three consensus-based features: 1. Inconsistent errors on consonants and vowels in repeated productions of syllables or words; 2. Lengthened and disrupted coarticulatory transitions between sounds and syllables; 3. Inappropriate prosody, especially in the realization of lexical or phrasal stress) and (b) any four of the following 10 features: 1. Difficulty achieving initial articulatory c…	1	CAS-b (moderate-severe) CAS+-a (severe)	CAS: 5;7 CAS+: 6;1	0*	0	15 children did not demonstrate all three features in the ASHA feature list and were classified as non-CAS. Non-CAS diagnoses included ataxic dysarthria (n = 1), flaccid dysarthria (n = 1), submucous cleft (n = 3), or primarily phonological disorder (n = 10; see Figure 1). Phonological impairment was identified in those who had clear phonological processes (Rvachew & Brosseau-Lapré, 2012) and an …	PD: Level 1 Other: Level 5	b (mild moderate)	6;5	0	0	1		0	0	0	0	0	1	1	1	1	1	Perceptual	1. DEAP Inconsistency subtest: Percentage inconsistency (across three repetitions of 25 words). 2. Single-Word Test of Polysyllables: Percentage of lexical stress matches; Distortion occurrences (out of a possible 328 phones); Syllable segregation occurrences (out of a possible 114 opportunities); Intrusive schwa occurrences (out of a possible 15 clusters); Voicing error occurrences (out of a pos…
9	Nijland, L. (2009). Speech perception in children with speech output disorders. Clinical Linguistics & Phonetics, 23(3), 222-239.	Nijland	2009	3	2018-04-03	CAS	PI	Netherlands	Dutch	English	Two groups of children participated. One group of children with speech output disorders (n=21) and one of group of TD (n=20).Participants were between 65-95 months of age. The disordered group contained children with CAS and PD.	CC	To explore speech perception in children with TD and disordered speech to determine whether each group evidenced higher- or lower-order perceptual deficits	41	1	17 (8 CAS + 9 with CAS/PD mix)	20 TD and 4 with PD	phonological disorder	1	Hall, Jordan, & Robin, 1993	0	0	"The children of both groups were between 5;5 and 7;11 years of age. The group of children with speech output disorders consists of children with CAS and/or PD, 12 boys and nine girls. Because of the rather broad age-range of the children it is a grea challenge to differentiate the children wtih CAS or PD since both speech diosrders mighexhibit different sympotms at different ages. Exlcusion crit…	Unintelligible speech for others and parents, inconsistency in articulation errors, and artic errors that are simplifications and more complex patterns	4	0	67-95 months	all: 7-F 10-M CAS only: 4-F 4-M CAS+PD: 3-F 6-M	0	unintelligible speech for others but not parents, consistency in artic errors, artic errors that are predominantly simplifications	4	0	65-92 months	PD: 2-F, 2-M TD: 12-F, 8-M	0	1		0	0	0	0	0	1	1	1	0	1	Perceptual (Auditory perception)	Higher level perception (rhyming task and categorical classification task) to lower-level perception (nonword and categorical discrimination tasks), and auditory temporal processing *frequency pattern task), memory tasks (hand movements, number recall, word order and spatial memory)
6	Parsons, C. L., Cox, A. L., & Reed, A. L. (1988). A comparison of verb usage in children with developmental apraxia of speech, functional articulation problems, and normal articulation. Australian Journal of Human Communication Disorders, 16(2), 45-53.	Parsons	1988	3	2018-02-14	DAS	SSD	Australia	Australian English	English	Three groups of 6 children were included: DAS, SSD, and TD. Groups were compared on verb production (verb omissions and omissions of grammatical markers) after completing a sentence repetition task.	CC	To determine if children with CAS, SSD, and TD are equivalent in verb usage	18	1	6	12	Functional articulation problems	1	0	1	Language impairment	Normal hearing, Australian English, IQ of 65 or above, Receptive language of 5;0 age or above, Expressive language of Brown's Stage III or above, no evidence or history of motor weakness or organic disability	Inability to produce /pa ta ka/ or slow rate in production on repeated trials, diagnosis of dyspraxia by referring slp, multiple artic errors (4 or more) on GFTA	5	0	7;9 years (5;3-12;2)	1-F 5-M	0	For SSD, ability to repeat /pa ta ka/ at appropriate rates on repeated trials, multiple articulation errors	4	0	6;6 (3;8-10;2)	FAP: 2-F, 4-M Control: 4-F, 2-M	0	0		0	0	0	0	0	1	1	1	0	1	Perceptual	verbs and grammatical markers omitted
12	Peter, B. (2006). Multivariate Characteristics and Data-Based Disorder Classification in Children with Speech Disorders of Unknown Origin. Unpublished PhD thesis. University of Washington.	Peter	2006	5	2018-08-20	CAS	PAD	USA	English	English	Identification of subtypes of speech disorder by means of cluster analysis on unlabeled, multivariate data (a principal component analysis (PCA) and a factor analysis (FA)). The clustering is compared with a priori classification based on Davis, Jakielski and Marquardt (1998) criteria.	other	Can subtypes of SD be identified based om objectified data, in a clinically and statistically valid way a self-classifying model using unlabeled, multivariate data)?	24	1	8	AD-3 PD -1 TD-12	AD; PD	1	Davis, Jakielski and Marquardt (1998)	0		"age 4 ½ to 7 years; moderate to severe speech disorder of unknown origin with standardized speech test (articulation and/or phonology) scores of at least 1.5 standard deviations below the mean; monolingual English home environment; hearing screen passed at 25 dB SPL, .5, 1, 2, 4, 8 kHz ; absence of fluency disorder; no history of sensorineural hearing loss; no history of acquired s…	"The criteria for the CAS label specified the presence of at least eight of the 11 CAS characteristics listed in Davis, Jakielski and Marquardt (1998), which consist of the following: 1. Limited consonant and vowel inventory; 2. Frequent omission errors; 3. High incidence of vowel errors; 4. Inconsistent articulation errors; 5. Altered suprasegmental characteristics (including rate, pitch, and lo…	1	0	5;7 (4;7-6;6)	2-F 6-M	unkown	Participants who did not meet criteria for the CAS label were labeled as consistent with articulation disorder/delay if their test scores from the standardized articulation test were lower than those from the standardized analysis of phonologic processes, or, alternatively, were labeled as consistent with phonologic disorder/delay in the converse configuration.	4	0	AD: 5;4 (5;0-6;0) PD: 4;11	AD: F-0, M-3 PD: F-1, M-0 TD: F-3, M-9	unkown	1		0	0	0	0	0	1	1	1	0	1	Perceptual, Acoustic	Table 4. 1. Receptive Vocabulary: Peabody Picture Vocabulary Test-Revised A. Standardized test score. Mean =100, SD = 15. 2. Sentence Comprehension Test for Auditory Comprehension of Language, Third Edition A. Standardized test score. Mean = 10, SD = 3. 3. Sentence Imitation Clinical Evaluation of Language Fundamentals-Preschool or 4 A. Standardized test score. Mean =10, SD = 3. 4. Word Naming Go…
11	Potter, N. L., Nievergelt, Y., & Shriberg, L. D. (2013). Motor and speech disorders in classic galactosemia. Jimd Reports, 11, 31-41. doi:http://dx.doi.org/10.1007/8904_2013_219	Potter	2013	2	2018-04-30	CAS	DYS non-CAS	USA	English	English	To compare children with galactosemia and speech disorders to typically developing children with respect to measures of speech and motor strength and coordination, and to examine associations (correlations) between these and other variables.	CC	"to: (1) determine if children with galactosemia and speech disorders differ from controls in strength and coordination skills, (2) examine relationships among speech, strength, and coordination skills, and (3) ascertain if there are relationships among the severity of motor or speech disorders and early ingestion of milk in children with galactosemia."	162	1	7	ataxic dysarthria= 1; MSD-NOS= 24; TD=130.	ataxic dysarthria MSD-NOS	2	SDCS	1	galactosemia Low IQ (< 85)*	"Children with galactosemia met the following criteria: (a) a confirmed diagnosis of classic galactosemia, (b) a history of treatment for speech disorders, (c) English as a first language, (d) no significant hearing loss as measured by a pure tone screening test, and (e) no craniofacial anomalies." and "Controls met the following criteria: (a) academic performance at grade level with no history o…	9*	5	0	"between 4 and 16 years of age"*	0	Galactosemia	9*	5	0	"between 4 and 16 years of age"*	0	Galactosemia	9		0	0	0		0	2	0	1	0	0	Kinematic, Perceptual	PCC
5	Prichard, C. L., Tekieli, M. E., & Kozup, J. M. (1979). Developmental Apraxia: Diagnostic Considerations. Journal of Communication Disorders, 12(4), 337-348	Prichard	1979	4	2018-04-30	DAS	AD	USA	English	English	"It is the purpose of this study to compare the performance of children labeled as developmentally apraxic with that of children with functional articulation disorders on a battery of diagnostic tests." p 339	CC	Comparison of hearing, auditory discrimination, comprehension, oral form discrimination and isolated volitional oral movements task (IVOM), a sequenced volitional oral movements task (SVOM), and the Arizona Articulation Proficiency Scale (AAPS) (Fudala, 1974).	6	1	3	3	FAD	0	None provided	9	n/a	None	Each of these children had received extensive therapy and numerous therapy procedures. None of the children had made significant progress; all were generally classified as highly unintelligible. They were matched in age with three children who exhibited “functional articulation disorders. ” p 339	5	0	(5 yr, 3 mo and 9 yr, 4 mo.)	0	0	None provided	5	0	(5 yr, 3 mo and 9 yr, 4 mo.)	0	0	1		0	0	0	0	0	0	1	1	0	0	Perceptual	Scores on tests: G-F-W (Overall Age Equivalent) and subtest scores, PPVT, Assessment of Children's Language Comprehension, Oral Form Discrimination Task, Isolated Volitional Oral Movements Task, Sequenced Volitional Oral Movements Task, Arizona Articulation Proficiency Scale.
5	Shriberg, L. D., Campbell, T. F., Karlsson, H. B., Brown, R. L., McSweeny, J. L., & Nadler, C. J. (2003). A diagnostic marker for childhood apraxia of speech: the lexical stress ratio. Clinical Linguistics & Phonetics, 17(7), 549-574.	Shriberg	2003	2	2018-04-21	sAOS	SD	USA	English	English	Comparing children with sAOS (CAS) with children with SD for LSR	CC	To assess the diagnostic accuracy of an acoustic stress marker for children with sAOS.	35	1	11	24	SD	1	Madison criteria (Shriberg & McSweeny (2002 Tech Report)) Pittsburgh criteria	0		two or more siblings with speech delay, at least one of whom they thought might meet criteria for apraxia of speech. Additional inclusionary criteria, as obtained from case history data and clinical records, were that children have normal hearing sensitivity and language comprehension skills as well as no documented or suspected neurological or development disorder	(from table 2): Madison criteria: (1) error consistency, (2) sound/syllable segregation, (3) stress. Pittsburgh criteria: (1) rate and precision, (2) sound/syllable transitions, (3) stress	3	b (individual and group)	7;1 (SD = 2;1; range = 3;3 - 10;10)	1-F 10-M	0	0*	4*	b (individual and group)	6;4 (SD = 2;5; range = 3;4 - 12;0)	8-F, 16-M	0	9		0	0	0	0	0	0	0	1*	0	0	Acoustic	n/a
10	Shriberg, L. D., Potter, N. L., & Strand, E. A. (2011). Prevalence and phenotype of childhood apraxia of speech in youth with galactosemia. Journal of Speech, Language & Hearing Research, 54(2), 487-519. doi:1092-4388(2010/10-0068)	Shriberg	2011	2	2018-04-29	CAS	non-CAS	USA	English	English	Compare children with galactosemia and history of speech disorder on a number of measures to determine whether or how many meet criteria for CAS	Other*	What speech, prosody, and/or voice indices best discriminate participants with galactosemia and CAS from participants with galactosemia and other SSDs?	127	0*	8	Total control subjects: N=119 Galactosemia (GALT), non-CAS: N=24 of which GALT-SD (speech delay): N=9 GALT-SE (speech errors): N=15 TD (typical development): N=70 SD (speech delay of unknown origin): N=25	GALT-SD: galactosemia, speech delay GALT-SE: galactosemia, speech errors SD: speech delay of unknown origin MSD-DYS: dysarthria MSD-NOS: not otherwise specified these latter labels are derived from the Competence, Precision, Stability Analytics framework, not used for initial classification).	2	Mayo Clinic System	1	Cognitive impairment (<85): N=6 (75%) Atypical oral structure: N=2 (25%) Atypical oral function: N=8 (100%) Dysarthria: N=1 (12.5%) * see note	Galactosemia groups: "participants [who] met the following inclusionary/exclusionary criteria: (a) a diagnosis of classic (full expression) galactosemia; ( b) prior or persistent SSD, as documented by a history of treatment for SSDs; (c) 4–17 years of age; (d) residence in the United States; (e) English as the only or first language; and (f ) no history of significant hearing loss or craniofacial…	"To meet criteria for CAS, a participant had to have evidence of four of the following 10 behaviors in three or more MSAP tasks: vowel distortions, difficulty achieving initial articulatory configurations or transitionary movement gestures, equal stress or lexical stress errors, distorted substitutions, syllable segregation, groping, intrusive schwa, voicing errors, slow rate, slow diadochokineti…	3	b*	Mean = 111.4 months (SD = 50.3 months). No range given. = 9;3 m;y with 4;2 SD.	2-F 6-M	Galactosemia	"GALT SD met criteria for active speech delay (children younger than 9 years of age) or persistent speech delay (individuals older than 9 years of age with residual speech sound deletions and/or substitutions [Shriberg, Fourakis, et al., 2010a]). [...] GALT SE had a distortion-only subtype of SSD termed Speech Errors (SE) in the SDCS–Typology (i.e., they did not meet SDCS criteria for present or …	4*	b*	GALT SD: 81.2 months (SD 21.3 months) -- 6;11 (SD 1;9) GALT SE: 115.8 (SD 27.5) -- 9;8 (SD 2;4) SD: between 3 and 6 years old (only a range given)	GALT SD: 2-F, 7-M GALT SE: 7-F, 8-M TD: 35-F, 35-M SD: no information (described elsewhere: Hauner, Shriberg, Kwiatkowski, & Allen, 2005)	galactosemia (GALT SD and GALT SE) unknown (SD)	1*		0	0	1	Q188R/Q188R GALT CAS: N=3/3 tested GALT SD: 4/6 tested GALT SE: 6/13 tested No further information on other participants ("Documented genotypes were not available for all participants, limiting generalization from the nonsignificant trends in Table 3 for a higher percentage of GALT CAS participants to have the Q188R/Q188R genotype")	1	1	1	1	0	2	Perceptual, Acoustic	87 measures total from Competence, Precision, Stability Analytics (CPSA) framework. See Table 2 in paper for full list.
8	Shriberg, L. D., Strand, E. A., Fourakis, M., Jakielski, K. J., Hall, S. D., Karlsson, H. B., . . . Wilson, D. L. (2017). A diagnostic marker to discriminate childhood apraxia of speech from speech delay: II. validity studies of the pause marker. Journal of Speech, Language, and Hearing Research, 60(4), S1118-S1134. doi:10.1044/2016_JSLHR-S-15-0297	Shriberg	2017	2	2018-04-22	CAS	SD non-CAS	USA	English	English	Group comparison of CAS with SD and adult apraxia of speech	CC*	To determine whether findings from construct and criterion validity studies support the diagnostic accuracy of the PM to discriminate CAS from speech delay (SD)	296	1	60	236 Adult-onset Apraxia of Speech (AAS): N=31 of which AOS (primarily stroke-based AOS): N=15 PPAOS (Primary Progressive AOS): N=16 SD: N=205	AAS (adult-onset AOS), including AOS (stroke-based) and PPAOS (primary progressive AOS) SD (Speech Delay)	2	Mayo Clinic System	9		Inclusion criteria for each of the eight study cohorts required [1.] English as the only or primary language spoken in the home and [2.] the intellectual ability and psychosocial disposition to complete the 2-hr speech-language assessment protocol. For CAS: "participants who were suspected to be positive for CAS" (no details provided) For SD of unknown (idiopathic) origin: "no frank cognitive, st…	To be classified as positive for CAS using the MCS, a speaker is required to meet criteria for at least 4 of the 10 listed signs occurring in at least 3 of the 17 speech tasks in the Madison Speech Assessment Protocol (Shriberg et al., 2010a). 1. Vowel distortions 2. Voicing errors 3. Distorted substitutions 4. Difficulty achieving initial articulatory configurations or transitionary movement ges…	3	b*	All: 9.7 (SD = 4.6; range = 4-25) CAS-Idiopathic subgroup: 9.0 (SD = 4.2; range = 4-23) CAS-Neurogenetic subgroup: 10.9 (SD = 5.2; range = 4-25)	All: 23-F 37-M CAS-Idiopathic: 13-F 28-M CAS-Neurogenetic: 10-F 9-M	Idiopathic: N=41 Neurogenetic: N=19 of which "copy-number variants (n = 9) identified in related research and participants with neurodevelopmental disorders associated with disruptions in FOXP2 (n = 2), 4q;16q translocations (n = 3), 16p11.2 microdeletion syndrome (n = 2), terminal deletion of chromosome 22 (n = 1), Joubert syndrome (n = 1), and Prader–Willi syndrome (n = 1)."	2*	4*	b*	SD: 4.4 (SD = 1.1; range = 3-9) AAS all: 66.8 (SD = 11.1; range = 45-84) of which AOS: 62.3 (SD = 11.6; range = 45-82) PPAOS: 71.0 (SD = 9.0; range = 53-84)	SD: 60-F, 145-M AAS all: 11-F, 20-M of which AOS: 4-F, 11-M PPAOS: 7-F, 9-M	SD: idiopathic AOS: primarily stroke PPAOS: neurodegenerative disease	9		0	0	1*	CAS group: "copy-number variants (n = 9) identified in related research and participants with neurodevelopmental disorders associated with disruptions in FOXP2 (n = 2), 4q;16q translocations (n = 3), 16p11.2 microdeletion syndrome (n = 2), terminal deletion of chromosome 22 (n = 1), Joubert syndrome (n = 1), and Prader–Willi syndrome (n = 1)."	0	0*	0	0*	0*	0*	Acoustic
9	Shriberg, L. D., Strand, E. A., Fourakis, M., Jakielski, K. J., Hall, S. D., Karlsson, H. B., . . . Wilson, D. L. (2017). A diagnostic marker to discriminate childhood apraxia of speech from speech delay: III. theoretical coherence of the pause marker with speech processing deficits in childhood apraxia of speech. Journal of Speech, Language, and Hearing Research, 60(4), S1135-S1152. doi:10.1044/…	Shriberg	2017	2	2018-04-22	CAS	SD non-CAS	USA	English	English	"we address the coherence of the PM to the speech processing findings by examining statistically and theoretically informative similarities and differences in the pause and speech elements of the PM in participants with CAS compared to participants with AAS"	CC	"[to] assess[es] the theoretical coherence of the PM with speech processing deficits in CAS" "to clarify whether CAS is best understood as a motor speech disorder (MSD) only, or alternatively, if representational (encoding, memory, language) deficits are part of the core pathobiological phenotype" "to address the coherence of the PM to the speech processing findings by examining statistically and…	310	1	37	total: 273 SD: N=205 AAS (adult-onset AOS): N=22 of which AOS (stroke-based AOS): N=10 PPAOS (primary progressive AOS): N=12 Complex neurodevelopmental disorder: N=46	SD (speech delay) AAS (adult-onset AOS) CND (complex neurodevelopmental disorder) -- also had CAS	0*		9		2	FROM OTHER SOURCE: To be classified as positive for CAS using the MCS, a speaker is required to meet criteria for at least 4 of the 10 listed signs occurring in at least 3 of the 17 speech tasks in the Madison Speech Assessment Protocol (Shriberg et al., 2010a). 1. Vowel distortions 2. Voicing errors 3. Distorted substitutions 4. Difficulty achieving initial articulatory configurations or transit…	3	b*	All CAS: 9.8 (SD = 4.7; range = 4-23) Idiopathic CAS: 9.1 (SD = 5.1; range = 4-23) Neurogenetic CAS: 10.9 (SD = 4.7; range = 5-19)	All: 16-F 21-M Idiopathic CAS: 8-F 14-M Neurogenetic CAS: 8-F 7-M	Idiopathic: N=22 Neurogenetic: N=15 (no further details provided)	2*	4*	b*	SD: 4.4 (SD = 1.1; range = 3-9) AAS all: 67.3 (SD = 11.8; range = 45-84) of which AOS: 63.3 (SD = 12.9; range = 45-82) PPAOS: 70.7 (SD = 10.1; range = 53-84) CND: 10.2 (SD = 4.7; range = 3-18)	SD: 60-F, 145-M AAS all: 9-F, 13-M of which AOS: 3-F, 7-M PPAOS: 6-F, 6-M CND: 13-F, 33-M	SD: idiopathic AOS: primarily stroke PPAOS: neurodegenerative disease CND: 22q11.2 deletion syndrome (9), Down syndrome (15), Fragile X syndrome (3), Galactosemia (6), suspected motor speech disorder (16), and traumatic brain injury (2).	9		0	0	1*	CND: 22q11.2 deletion syndrome (9), Down syndrome (15), Fragile X syndrome (3), Galactosemia (6)	0	0*	0	0*	0*	0*	Perceptual, Acoustic	SRT measures: SRT Performance scale ("phonological memory") Memory subscale of the SRT Encoding Transcoding PSVP measures: Inappropriate prosody and voice characteristics are perceptually coded using a set of 32 PVSP codes (Shriberg et al., 1990), with PVSP percentage scores. The focus is on standardized findings for the two prosodic domains of Stress and Rate. Precision-Stability Index (Shriberg…
6	Shriberg, L. D., Lohmeier, H. L., Strand, E. A., & Jakielski, K. J. (2012). Encoding, memory, and transcoding deficits in childhood apraxia of speech. Clinical Linguistics & Phonetics, 26(5), 445-482.	Shriberg	2012	2	2018-04-21	CAS	SD*	USA	English	English	pair-wise comparisons among the four participant groups on the four SRT scores.	CC	The focus of this report is on the type and informativeness of diagnostic information for CAS available from responses to nonword repetition tasks.	369	1	40	329 TSTL: 119 SDTL: 140 SDLI: 70	SD (SDTL: Speech Delay, Typical Language SDLI: Speech Delay, Language Impairment)	1	Shriberg, Potter, & Strand (2011)	1	Language impairment (N=40) Intellectual impairment (N=22) Hearing impairment (N=7) Dysarthria (N=1)	SDCS software classified participants as meeting criteria for Typical Speech (TS [termed Normal Speech Acquisition in the SDCS]) or Speech Delay (SD), the latter including a classification for marginal speech delay termed normal speech acquisition/Speech Delay. Participants’ language status was classified as either typical language (TL) or Language Impairment (LI) based on whether their standardi…	"at least 4 of the 10 proposed signs of apraxia of speech [listed below, quoted from table], as each sign occurred in at least 3 of the speech tasks in the assessment protocol [...] 1. Vowel distortions 2. Voicing errors 3. Distorted substitutions 4. Difficulty achieving initial articulatory configurations or transitionary movement gestures 5. Groping 6. Intrusive schwa 7. Increased difficulty wi…	3	a (group mean for CAS-Neurogenetic, 3-6 years old), N=4 b (group means for CAS-Idiopathic [3-6 years old & 7+ years old], and for CAS-Neurogenetic, 7+ years old), N=32	11 (SD = 8; range = 4-50)	16-F 24-M	Idiopathic: N=20 Neurogenetic: N=20, of which Chromosome deletion or translocation: N=4 Copy number variations: N=2 FOXP2: N=4 Galactosaemia: N=8 Joubert syndrome: N=1 Prader-Willi syndrome: N=1	2*	4*	b	SD all: 5 (range 3-18) SDTL: 5 (SD = 3; range = 3-18) SDLI: 5 (SD = 3; range = 3-18) TSTL: 7 (SD = 4; range = 3-22)	All: 140-F, 189-M SD all: 64-F, 146-M SDTL: 47-F, 93-M SDLI: 17-F, 53-M TSTL: 76-F, 43-M	0	9		0	0	1* 20-CAS	Chromosome deletion or translocation: N=4 Copy number variations: N=2 FOXP2: N=4 Galactosaemia: N=8 Joubert syndrome: N=1 Prader-Willi syndrome: N=1	0	1	1*	1*	0	0	Perceptual	overall and subscale speech competence scores: 1. total percentage of correctly repeated consonant sounds 2. subscales percentages for the 2-, 3-, and 4-syllable items Errors: 3. Encoding measure: Percentage of Within-Class Manner Substitutions 4. Memory measure: 100 ∗ (1 + log value[3-syllable: 2 syllable ratio]) 5. Transcoding measure: 100 - (percentages of responses to each of the 18 SRT items…
1	Shriberg, L. D., & et al. (1997). Developmental Apraxia of Speech: II. Toward a Diagnostic Marker. Journal of Speech, Language, and Hearing Research, 40(2), 286-312.	Shriberg	1997	2	2017-11-12	DAS	SD	USA	English	English	2 studies: (1) 14 children with DAS from previous study series were recruited and divided into younger and older subgroups (N=7 each) and compared to children with SD (N=64 for younger group; N=9 for older group) on a wide range of perceptual measures based on conversational speech samples (including PCC, PVC, prosody-voice codes, error types, consistency) (2) retrospective cross-validation study…	CC	Study 1: Exploring multiple perceptual features as potential diagnostic markers Study 2: Exploring one perceptual feature (inappropriate stress) as potential marker	107	1	34 Study 1: 14 Study 2: 20	73* (Study 1 only)	SD of unknown origin (also referred to as phonological disorder)	0, 2	referral diagnosis	1	Study 1: Receptive language impairment (10/14) Expressive language impairment (14/14) Intelligence >1 SD below mean (5/14) Oral apraxia (5/14) Study 2: unknown	none provided	9	4	Study 1: b (group mean) Study 2: 0	Study 1: 7;11 (4;10 - 14;11) Younger group: 5;9 (4;10 - 6;3) Older group: 10;2 (7;1 - 14;11) Study 2: 6;1 (3;2 - 9;3)	7-F 27-M Study 1: 2-F 12-M Study 2: 5-F 15-M	0	9	4	Study 1: b (group mean)	Study 1 Younger group: 4;3 (3;0 - 6;1) (from Shriberg & Kwiatkowski (1994)) Study 1 Older group: 7;11 (7 - 13, no further detail)	Study 1 Younger group: 23-F, 41-M Study 1 Older group: 0	0	Study 1: 0 Study 2: 1		Study 1: 0 Study 2: 0	Study 1: 0 Study 2: 0	Study 1: 0 Study 2: 0	Study 1: 0 Study 2: 0	Study 1: 0 Study 2: 0	Study 1: 1* Study 2: 0	Study 1: 1 Study 2: 0	Study 1: 1 Study 2: 0	Study 1: 0 Study 2: 0	0	Perceptual	Study 1: PCC, PCC-A, PCC-R, PVC, Intelligibility Index PSVP: Phrasing, Rate (Slow Articulation/Pause Time), Stress (Excessive/Equal/Misplaced Stress), Loudness, Pitch, Laryngeal Quality, Resonance Quality (Denasal) Phonological Processes: Cluster Reduction-Initial, Liquid Simplification-Initial, Stopping-Initial, Liquid Simplification-Final, Cluster Reduction-Final, Velar Fronting-Initial, Palata…
	Shriberg, L. D., Paul, R., Black, L. M., & van Santen, J. P. (2011). The hypothesis of apraxia of speech in children with autism spectrum disorder. Journal of Autism and Developmental Disorders, 41(4), 405-426.	Shriberg	2011	6	2017-11-26	CAS	SD	USA	English	English	To compare children with ASD to children with other speech disorders, including CAS, on a range of perceptual speech features from the PSVP	CC	To test the hypothesis that CAS contributes to the inappropriate speech, prosody and voice features in some children and adults with verbal autism spectrum disorder (ASD)	114 ASD (N=46) Typical (N=40) SD (N=13) CAS (N=15)	1	15	ASD-46, TD-40, SD-13	SD, ASD	1	Shriberg, Fourakis, et al (2010) Shriberg, Potter, Strand (in press) ([at time of publication]	1	For CAS: 8 galactosemia, 3 FOXP2, 3 unbalanced 4q;16q translocation, 1 Joubert syndrome	ASD group: Previous Dx of ASD, Aspergers, PDD-NOS Full-scale IQ ≥ 70 MLU ≥ 3 Intelligibility > 70% Normal hearing and vision Monolingual English Normal craniofacial anatomy No neurological impairment CAS group: Neurogenetic etiology for CAS	* Lengthened vowels Distorted rhotics Increased percentage of phoneme distortions Slower speaking rate Slower articulation rate Increased repetitions and revisions Reduced percentage of glides correct Lowered sibilant centroids Increased vowels-consonants intensity ratio Less stable whole-word errors	4	0	5-49 years, children and adults	0	8-Galactosemia 3-FOXP2 disruption 3-chromosome 4q;16q translocation 1-Joubert syndrome	ASD: "(a) a previous diagnosis of autism, PDD-NOS, ASD, or Asperger syn- drome from a qualified clinician; (b) full scale IQ C 70; (c) mean length of utterance of at least 3.0, based on tran- scription of a 3–5 min conversational sample; (d) [70% of words intelligible in the language sample; and (e) normal hearing and vision (or corrected with glasses) on standard screening. Exclusionary criteria…	ASD: 1; SD: 5	ASD: [70% of words intelligible in the language sample; SD not stated.	ASD: mean 69.9 months (SD 14.4) range 4-7 years old SD: range 4-6 years old	ASD: 36-M 10-F	ASD	9		0	0	1	The 15 speakers with CAS included 8 participants with classic galactosemia (Shriberg et al. in press), 3 participants with disruptions in the FOXP2 gene (Shriberg et al. 2006, 2010c), 3 siblings with an unbalanced chromosome 4q;16q translocation (Shriberg et al. 2008), and 1 participant with Joubert syndrome	0	1	1	1	1	0	Perceptual, Acoustic	Prosody: Phrasing, Rate, Stress; Voice: Loudness, Pitch, Voice Quality, and Resonance CAS markers: increased repetitions & revisions; reduced percentage of glides correct; less stable whole word errors
4	Shriberg, L. D., Green, J. R., Campbell, T. F., McSweeny, J. L., & Scheer, A. R. (2003). A diagnostic marker for childhood apraxia of speech: the coefficient of variation ratio. Clinical Linguistics & Phonetics, 17(7), 575-595.	Shriberg	2003	2	2017-11-26	sAOS	SD	USA	English	English	Comparing children with CAS (sAOS) to children with SD and children with typical speech development with respect to the Coefficient of Variation Ratio (CVR)	CC	To assess the potential of a temporal variation metric as a diagnostic marker for CAS	75	1	15	60* Normal Speech Acquisition (NSA) N=30 SD N=30	SD	1	Shriberg & McSweeny (2002 Tech Report)	1	dysarthria*	NSA: PCC-R > 95% age 3-5 Normal speech acquisition according to SDCS SD: age 3-5 meet criteria for SD on SDCS PCC-R < 85% sAOS: provisional markers for sAOS or sDYS on SDCS perceived speech-timing deficit consistent with syllable segregation Marginal or non-marginal classification based on SDCS criteria	Meet phonological process or residual distortion error criteria for current or prior speech delay, plus a total of 1-1.5 (marginal) or >2 points (non-marginal) for the 8 (six??) segmental and prosody markers below: 1. Excessive/equal stress 2. Inappropriate timing (syllable segregation; isochrony) 3. Inconsistent errors on the same word type 4. Prearticulatory oral gestures (groping) 5. Postartic…	5	b (group mean)	6;11 (3;4) range 3-14	2-F 13-M	0	meet criteria for SD on SDCS PCC-R < 85%	4	b (group mean)	4;4 (0;11) range 3-5	NSA: 15-F, 15-M SD: 15-F-15-M	0	0		0	0	0	0	0	0	0	0	0	0	Acoustic
7	Smith, B., Marquardt, T. P., Cannito, M., & Davis, B. (1994). Vowel variability in developmental apraxia of speech. In Till, J. A., Yorkston, K. M., & Buekelman, D. R. (Eds.), Motor Speech Disorders (pp. 81–89). Baltimore, MD: Brookes.	Smith	1994	3	2018-04-04	DAS	SSD	USA	English	English	Three children (1 CAS, 1 PD/AD, 1TD) (8-8;10) were included. Articulatory variability in acoustic vowel productions was investigated.	CC	To determine if acoustic articulatory variability differs for vowels produced by children w CAS, SSD, and TD	3	1	1	2 (1 TD, 1 PD)	nonapraxic phonologic/articulation deficit	1	0	1	Language Impairment	Normal hearing, monolingual english speaking families, normal speech structures on Orla Speech Mechanism Screening Examination.	Severe articulation disorder, simple syylable shapes, inconsistent articualtion errors, marked difficulty on longer utterances. Diagnosis of DAS was based on normal receptive language findings, difficulty sequencing oral movements, a severe articulation disorder, reduced expressive language, and cogntive ability wihin normal limits based on previous testing.	4	a	8-8;10 (reported for all subjects)	1-M	0	Normal language development, artic test standard score more than one SD below the mean for his age.	4	0	8-8;10 (reported for all subjects)	2 M	0	1 (says child was followed for 2 years . . . Could this mean treatment)		0	0	0	0	0	1	1	1	0	1	Acoustic	n/a
8	Strand, E. A., McCauley, R. J., Weigand, S. D., Stoeckel, R. E., & Baas, B. S. (2013). A motor speech assessment for children with severe speech disorders: Reliability and validity evidence. Journal of Speech, Language & Hearing Research, 56(2), 505-520. doi:1092-4388(2012/12-0094)	Strand	2013	3	2018-02-14	DAS	SSD	USA	English	English	Participants were 81 children between 36 and 79 months of age who were referred to the Mayo Clinic for diagnosis of speech sound disorders. Children were given the DEMSS and a standard speech and language test battery as part of routine evaluations. Subsequently, intrajudge, interjudge, and test–retest reliability were evaluated for a subset of participants. Construct validity was explored for al…	Other*	To determine reliability and validity evidence for the Dynamic Evaluation of Motor Speech Skill	81	0	20	61	Non-CAS	0 (vaguely)	0	1	language impairment, possibly cog impairment (low PPVT scores for some which is a correlate)	Participants included 81 children (63 males, 18 females) between the ages of 36 and 79 months who were consecutively referred for evaluations at the Mayo Clinic for concerns regarding SSDs. Exclusionary criteria included structural deficits (e.g., cleft palate), hearing loss, English as a second language, autism spectrum disorder, and dysarthria. These were determined by the medical record, histo…	"In our clinical practice, diagnoses related to apraxia of speech typically indicate whether the difficulty with praxis for speech movement is the primary deficit, which is reported as CAS. Alternatively, if difficulty with speech praxis contributes in a lesser or mild way to the child’s SSD, it is reported as either ‘‘phonologic impairment with mild deficits in motor planning/programming (mild C…	3	a-b	37-84 months	5-F 15-M	0	0	5	b	36-75 months	13 females; 48 males	0	0		0	0	0	0	0	*	1	1	0	0	Perceptual	articulatory accuracy, vowel accuracy, prosodic accuarcy, consistency
5	Terband, H., Maassen, B., van Lieshout, P., & Nijland, L. (2011). Stability and composition of functional synergies for speech movements in children with developmental speech disorders. Journal of Communication Disorders, 44(1), 59-74.	Terband	2011	1	2018-01-22	CAS	SSD	0	Dutch	English	10 children with developmental speech disorders (5 with SSD, 5 with CAS) were compared to 6 typically developing children based on kinematic data on reiterated productions of syllables spa and pass. This was analyzed using EMMA.	CC	describe the development of speech motor control and explain the role of functional synergies/coordinative structures; (2) explain the measurement of the stability and composition of speech movements; (3) identify the difficulties in studying disordered speech motor development; (4) describe the differences in speech motor characteristics between SSD and subtype CAS; (5) describe the potential ro…	16	1	5	6 typically developing and 5 SSD	Developmental speech disorder	1	Procedure described by Nijland (2009)	0	n/a	normal hearing acuity and fewer than six reported episodes of otitis media before age 3, (b) absence of neurological disorders, and (c) normal intelligence defined as a Performance IQ of 80 or above on the Wechsler Intelligence Scale for Children–Third EditionNo hearing, language comprehension, below subnormal intelligence, organic orofacial disorders, motor disturbances, or dysarthria in any par…	Nijland (2009). CAS = (a) clinical judgment of CAS/SSD (from semi-spontaneous utterances, picture naming, word repetition and oral-motor movement assessment) + pataka could not be produced OR (b) clinical judgment of CAS/SSD + high % CAS-characteristics + pataka produced correctly but no acceleration (CAS-characteristics = unintelligible speech for parents and others; inconsistency in articulatio…	3	0	7;3, 7;3, 8;9, 7;7, 7;2	3-F 2-M	0	SSD = (a) clinical judgment = SSD or CAS + no evident [pataka] problems OR (b) clinical judgment = SSD or CAS + high % SSD-characteristics + [pataka] in sequence incorrect, but accelerates on two different consonants. SSD-characteristics = unintelligible speech for others, but not for parents; consistency in articulation errors; and consonantal errors mostly comprising simplifications	4	0	SSD; 6;2–8;9 years;months	SSD: 1-F, 4-M control: 3-F, 3-M	0	1- Diagnosis of participants and their inclusion in study was completed through documentation from each participant's speech therapist.	0	0	0	0	0	All participants chosen from a primary special school	Subnormal intelligence needed	no difficulty with language comprehension (defined as one SD below the population's average)	No participants had hearing difficulty (pure tone threshold exceeding 25 dBHL)	0	1	Kinematic	n/a
6	Terband, H., Zaalen, Y. V., & Maassen, B. (2012). Lateral jaw stability in adults, children, and children with developmental speech disorders. Journal of Medical Speech-Language Pathology, 20(4), 112-118.	Terband	2012	1	2018-01-22	CAS	PI, AD	Netherlands	Dutch	English	Compared lateral jaw stability in typically speaking children and adults. And then, compared jaw movement trajectories of five children with a variety of speech sound disorders with the norm data.	CC	To test if children with developmental speech disorders, like CAS, will show lateral movements of articulators. This will be assessed through a 3D movement recording system	39	1	1	38 TD-16 adults-18 PAD-3 PD-1	SSD, PAD (phonetic articulation disorder); Phonological disorder	1	Classification of the SSD group can be found in Appendices 1 & 2.	1, in discussion there were comments on a participant with PAD (PAD1), exhibiting some apraxic characteristics.	n/a	"The children with developmental speech disorders were referred by speech pathologists, and the typically developing children were recruited from a nearby school. No participants had hearing problems (pure-tone thresholds not exceeding 25 db HL), language comprehension problems (a score ,1 standard deviation [SD] be- low population average), subnormal intelligence (IQ ,1 SD below population avera…	Nijland (2009). CAS = (a) clinical judgment of CAS/SSD (from semi-spontaneous utterances, picture naming, word repetition and oral-motor movement assessment) + pataka could not be produced OR (b) clinical judgment of CAS/SSD + high % CAS-characteristics + pataka produced correctly but no acceleration (CAS-characteristics = unintelligible speech for parents and others; inconsistency in articulatio…	3	0	5.0 years old	1-M	0	SSD = (a) clinical judgment = SSD or CAS + no evident [pataka] problems OR (b) clinical judgment = SSD or CAS + high % SSD-characteristics + [pataka] in sequence incorrect, but accelerates on two different consonants. SSD-characteristics = unintelligible speech for others, but not for parents; consistency in articulation errors; and consonantal errors mostly comprising simplifications	4	0	Typical: adults: 20;9-26;1, Typical children: 4;9-6.6, PAD: 5;4, 5;5, 4;1, Phonological disorder: 6;8	PAD: 0-F, 3-M PD: 1-F, 0-M TD Adults: 10-F, 8-M TD children: 9-F, 7-M	0	Speech therapists were apart of inclusion criteria of the study	0	0	0	0	0	Typically developing children recrutied from a school.	Subnormal intelligence from participants required.	Had to score less than one SD below population average	No hearing impairments from any participant	0	1	Kinematic	n/a
	Thoonen, G., Maassen, B., Wit, J., Gabreëls, F., & Schreuder, R. (1996). The integrated use of maximum performance tasks in differential diagnostic evaluations among children with motor speech disorders. Clinical Linguistics and Phonetics, 10, 311-336.	Thoonen	1996	2	2018-08-23	DAS	DYS	Netherlands	Dutch	English	"In this study MPT were administered to children, who were selected as clear representatives of DAS or dysarthric populations. A standardized protocol was developed for the administration and analysis of MPT. The quantitative measures obtained, derived from MPT form the basis for a clinical decision procedure."	CC	"In the present study the focus is on developmental apraxia of speech (DAS), and whether this disorder can be distinguished from both spastic dysarthria and normal-developing speech by using measures of MPT."	31	1	11	DYS-9 TD-11	DYS (spastic dysarthria)	1	Hall (1992), Hall et al. (1993) and Stackhouse (1992).	0	n/a	Each selected child had essentially normal hearing capacities as measured by pure-tone audiometric testing (maximum hearing loss of 25 dB at better ear); had no structural problems in the speech organs that could be held responsible for speaking problems; and did not suffer from a severe attention deficit. each child was tested during a short screening session. This screening included: (a) phonem…	high rates of speech sound errors, groping of the articulators, periods of highly unintelligible speech, difficulties or inability to produce complex phonemic sequences, high incidence of context-related sound substitutions (e.g. metathetic errors), and an inconsistent speech performance. An inclusion criterion obtained from the medical and educational records was a slow development and remediati…	3	moderate and severe	6;11 (6;03 - 7;09)	2-F 9-M	unkown	The classification of spastic dysarthria was based on a cluster of speech symptoms as described by Yorkston, Beukelman and Bell (1987) and re-evaluated by Workinger and Kent ( 1991 ). The speech criteria for inclusion were: slow speech rate, hypernasality, low and monotonous pitch, harshness of voice with strained and strangled quality, and imprecise consonant production. The final admission to t…	1	moderate and severe	8;01 (6;04 - 10;03)	Dysarthria: 4-F, 5-M Control: 3-F, 8-M	infantile encephalopathy	1		0	0	0	0	0	1	0	1	0	1	Perceptual, Acoustic	Attempts (the number of attempts required to produce a correct trisyllabic sequence in addition to the standard test trials) Syllable sequence (whether the obtained sequence was correct or not)
	Thoonen, G., Maassen, B., Gabreëls, F., & Schreuder, R. (1999). Validity of maximum performance tasks to diagnose motor speech disorders in children. Clinical Linguistics & Phonetics, 13, 1-23	Thoonen	1999	2	2018-08-23	DAS	DYS non-CAS	Netherlands	Dutch	English	"The aim of the present study is to cross-validate this diagnostic procedure [from Thoonen et al., 1996 - EM]. To achieve this aim the maximum performance tasks of the protocol, consisting of maximum vowel and fricative prolongation, and maximum syllable repetition, were administered to less clear cases of DAS and spastic dysarthria, children with a speech disorder of unknown origin and newly sel…	CC	"The aim of the present study is to evaluate and cross-validate the diagnostic procedure ( Thoonen et al., 1996 ), developed to assess motoric involvement in childhood speech disorders."	41*	1	10*	31 total DysA-9* nSD-11* TD-11*	DysA = spastic dysarthria nSD = non-specific speech disorder ("articulation disorder, delayed phonological acquisition, consistent deviant disorder and inconsistent disorders (Dodd, 1995).")	1	Thoonen et al. (1996): Hall (1992), Hall et al. (1993) and Stackhouse (1992).	1	dysarthria & CAS (14 children: 6 primarily CAS, 8 primarily DYS). No further information for these or other groups provided	"The most important inclusion criteria for DAS were high rates of speech sound errors, inconsistent error patterns, difficulties in producing articulatory complex sound sequences, and groping behaviour. For dysarthria the most important criteria were slow speech rate, imprecise consonants, and consistent error patterns. (For further details the reader is referred to Thoonen et al., 1996.) The nor…	"The most important inclusion criteria for DAS were high rates of speech sound errors, inconsistent error patterns, difficulties in producing articulatory complex sound sequences, and groping behaviour"	3	0	67.1 months (53-90)	5-F 5-M	0	"For dysarthria the most important criteria were slow speech rate, imprecise consonants, and consistent error patterns. (For further details the reader is referred to Thoonen et al., 1996.)" "articulation disorder, delayed phonological acquisition, consistent deviant disorder and inconsistent disorders (Dodd, 1995). It is a heterogeneous group with a speech disorder sufficiently severe to serve …	DysA-1 nSD-5	0	DysA = 137.7 months (64-197) nSD = 93.1 months (52-131)	DysA: 3-F, 6-M nSD: 1-F, 10-M control: 3-F, 8-M	0	1*		0	0	0	0	0	1	0	0	0	0*	Perceptual, Acoustic	Attempts (the number of attempts required to produce a correct trisyllabic sequence in addition to the standard test trials) Syllable sequence (whether the obtained sequence was correct or not)
1	Velleman, S. L., & Shriberg, L. D. (1999). Metrical analysis of the speech of children with suspected developmental apraxia of speech. Journal of Speech, Language & Hearing Research, 42(6), 1444-1460	Velleman	1999	5	2017-11-27	DAS	SD	USA	English	English	subsample of 15 kids with sDAS from the 1997 series of studies by Shriberg, Aram & Kwiatkowski were divided into two groups of yes/no appropriate phrasal stress and compared on lexical metrical patterns with each other as well as with a subsample of 15 children with SD	CC	1. Test whether metrical phonology is applicable to children with sDAS and SD; 2. Test whether lexical-level changes with metrical impacts (syllable omiissions and vowel augmentations) differs between the two sDAS groups.	30	1	15	15	SD	2	Shriberg, Aram & Kwiatkowski (1997) series	9		sDAS-inappropriate stress: less that 80% Percentage of Appropriate Stress scores; sDAS-appropriate stress: more than 90% Percentage of Appropriate Stress scores; SD: same age range	Sample and diagnosis borrowed from Shriberg, Aram & Kwiatkowski (1997) series of studies.	5	0	9;1 (4;9-14;11)	5-F 10-M	0	Same as Shriberg, Aram & Kwiatkowski (1997) series of studies.	4*		5;8 (3;3-12;10)	10-M 5-F	0	0		0	0	0	0	0	0	0	1	0	0	Perceptual	Metrical contexts for syllable omissions and vowel augmentations - narrow phonetic transcription
7	Vick, J. C., Campbell, T. F., Shriberg, L. D., Green, J. R., Truemper, K., Rusiewicz, H. L., & Moore, C. A. (2014). Data-driven subclassification of speech sound disorders in preschool children. Journal of Speech, Language & Hearing Research, 57(6), 2033-2050. doi:10.1044/2014_JSLHR-S-12-0193	Vick	2014	2	2018-04-21	CAS	SD	USA	English	English	Multivariate data mining: Subgroup discovery via Alternate Random Processes (SUBARP)	Other*	To determine whether a subgroup of children with atypical speech motor control could be identified from a sample of children with speech sound disorders (SSD). (and "which auditory–perceptual, acoustic, kinematic, and demographic measures best differentiate subgroups identified in the present sample of children with SSD")	97	0	13	N=84 Group A ("SD"): N=74 Group B ("MSD-NOS"): N=10	SD	0	0	9		inclusionary criteria required at least one of the following for each participant: 1. Referral to the study by a certified speech-language pathologist (SLP) noting a diagnosis, based on a formal diagnostic evaluation, of a moderate to severe SSD. 2. Classification as SD using SDCS procedures, including an error profile from the 100 first-occurrence words in the child’s conversational speech sampl…	9	5	b	3;9 (SD = 0;6)	0	0	0*	5*	b	Group A ("SD"): 3;10 (SD = 0;6) Group B ("MSD-NOS"): 3;7 (SD = 0;6)	0	0	9		0	0	0	0	1	0	1*	1	0	0*	Acoustic, Kinematic, perceptual	Proportion Attempted Proportion With Phonemes Correct Proportion of Trochees With Correct Stress Proportion Iambs With Correct Stress Proportion Used PCC: PCCR: PVC: PVCR: PPC: PPCR: II: Intelligibility Index. AWU: Average Words per Utterance
7	Williams, R., Ingham, R. J., & Rosenthal, J. (1981). A further analysis for developmental apraxia of speech in children with defective articulation. Journal of Speech & Hearing Research, 24(4), 496-505.	Williams	1981	1	2018-01-24	DAS	AD	Australia	English	English	30 children with defective articulation were compared to a group of 30 typically developing children in a test battery study, modeled after a study by Yoss and Darley.	CC	(1) What differences exist, between children who speak normally and those with defective articulation, in audi- tory perception and sequencing, volitional oral move- ment tasks, and performance of sequences of these movements? (2) Is there a relationship between neurologic findings and performance on the test battery Within this group of children? (3) What tasks significantly differentiate any su…	60	0	30 (30 AD that were then divided into 2 subgroups of based on isolated volitional oral movement performance)	30	Functional articulation; DAC(defective articulation group) disorder	0	Yoss and Darley 1974	0	n/a	6 criteria based on Yoss and Darley: 10 Chronologic age from 5 to 10 years [range: 5:1 (5 years, 1 month) to 9:11 years; median: 6:5 years], 2. Hearing within normal limits. 3. Intelligence quotient of 90 or above. 4. Language development age not more than six months below chronologic age. 5. No apparent organic disability as the primary etiology of the articulation problem	Apraxia isnt being used in selection of children	5	moderate to severe	5:1-9:11 years; Median 6.5	4-F 26-M	0	Typically developing matched to AD group for age and sex; met inclusion criteria used for the AD group minus criteria 6.	5*	0	4;10 to 9;10; Median 6.3	matched to AD group, no numbers given [match = 4-F, 26-M]	0	1 (24/30)	0	0	0	0	0	0	1	0	0	0	0	Perceptual	auditory perception and discrimination as measured by the DAPST; Aten, 1973); (2) isolated volitional oral move- ments (IVOM) and sequenced volitional oral movements (SVOM); (3) phoneme production in spontaneous contextual speech;(4) phoneme production in real and non- sense words; and (5) DDK rate.
8	Yoss, K. A., & Darley, F. L. (1974). Developmental apraxia of speech in children with defective articulation. Journal of Speech & Hearing Research, 17(3), 399-416. doi:http://dx.doi.org/10.1044/jshr.1703.399	Yoss	1974	1	2018-01-24	DAS	AD	USA	English	English	A battery of speech and nonspeech tasks completed by a group of 30 children with DAS and then compared to 30 typically developing children.	CC	(1) What differences exist, between children who speak normally and those with defective articulation, in audi- tory perception and sequencing, volitional oral move- ment tasks, and performance of sequences of these movements? (2) Is there a relationship between neurologic findings and performance on the test battery Within this group of children? (3) What tasks significantly differentiate any su…	60	0	30	30	Functional articulation; DAC(defective articulation group) disorder	0	Parts I through IV and Part VII of the Van Riper Predictive Screening Test (Van Riper and Erickson, 1968) were used as a screening measure of all subiects' articulatory abilities. In the DAC group, scores ranged from one to 31 correct; MCS either had a perfect score (40) or made one error	0	n/a	Chronologic age from 5 to 10 years [range: 5:1 to 9:10 years; median: 6:5 years], 2. Hearing within normal limits. 3. Intelligence quotient of 90 or above. 4. Language development age not more than six months below chronologic age. 5. No apparent organic disability as the primary etiology of the articulation problem	a level of articulatory production that constituted a clinical, social, or academic problem or warranted enrollment in speech therapy. The study is focused on articulation errors in: phonemic patterns in speech production, oral diadochokinetic rate, performance on volitional oral tasks, auditory perception and sequencing.	5	moderate to severe	5:1 to 9:10 years; median: 6:4 years	4-F 26-M	0	Typically developing matched to AD group for age and sex; met inclusion criteria used for the AD group minus criteria 6.	5*	0	5;3-9;8; Median 6:4 yrs	matched to AD group, no numbers given [match = 4-F, 26-M]	0	1	0	0	0	0	0	0	1	1	1	0	0	Perceptual	auditory perception and discrimination as measured by the DAPST; Aten, 1973); (2) isolated volitional oral move- ments (IVOM) and sequenced volitional oral movements (SVOM), i.e. oral apraxia tasks; (3) phoneme production in spontaneous contextual speech;(4) phoneme production in real and non- sense words; and (5) DDK rate.
5	Ziethe, A., Springer, L., Willmes, K., & Kröger, B. J. (2013). Study of core features of children with childhood apraxia of speech aged between 4 and 7 years. Sprache Stimme Gehor, 37(4), 210-214. doi:10.1055/s-0032-1323786	Ziethe	2013	5	13/2/2018	CAS*	PD	Germany	German	German	Explorative study into the core differential perceptual and acoustic features of CAS and PD	CC	"The aim of the current study was an investigation of core features of CAS and their distinction from children with PD."	28	1	8	PD-10 TD-10	PD	1	The three charactreistics of Ozanne (1995; The search for Developmental Verbal Dyspraxia (DVD). In: The Differential Diagnosis and Treatment of Children with Speech Disorders. London : Whurr.) with the addition of inappropriate prosody as a non-essential characteristic based on the ASHA 2007 technical report.	9	n/a	Monolingual German; IQ > 85; no hearing problems, mental retardation, bilingualism, dysarthria, or organic fuincion disorder of the articulation aparatus	At least the first 3 of the following 4: 1. Problems in phonological programming as evidences by high error inconsistency 2. Problems in phonetic planning and programming as evidenced by a slow diadochokinesis rate 3. Problems in motor planning and programming as evidenced by searching articulatory behaviour, consonant deletion, difference between volitional vs automatic speech 4. Inappropriate p…	3	0	5;5 (4;4-7;0)	1-F 7-M	0	Occurance of abnormal phonological processes; PD further divided in consistent and inconsistent (cut-off 40% inconsistency rate)	1	0	PD: 6;0 (4;0-7;6) Controls: 5;5 (4;5-6;0)	PD: 7-M, 3-F TD: 7-M, 3-F	0	0		0	0	0	0	0	0	0	1	0	1	Perceptual, Acoustic	Vowels correct in words, syllablkes and pseudowords (repetition task)
8	Zuk, J., Iuzzini-Seigel, J., Cabbage, K., Green, J. R., & Hogan, T. P. (2018). Poor speech perception is not a core deficit of childhood apraxia of speech: Preliminary findings. Journal of Speech, Language, and Hearing Research, 61(3), 583-592. doi:10.1044/2017_JSLHR-S-16-0106	Zuk	2018	4	2019-06-17	CAS	SD, LI, TD	USA	English	English	The current study evaluated speech perception abilities within five well-characterized groups: children with CAS relative to those with CAS and co-occurring language impairment, those with language impairment only, those with speech delay, and their typically developing peers.	CC	Exploring one characteristic (speech perception of voicing [d]<>[g] "Our goal was to determine if speech perception deficits are central to the symptom profile of children with CAS or a symptom of the co-occurring language deficit and/or the presence of a nonspecific speech sound deficit (i.e., speech delay)."	47	1	13	TD = 15 SD = 12 LI = 7	TD, SD, LI,	1	At least five out of 11 CAS features (adapted from Shriberg, Potter, & Strand, 2011)	1	Language impairment	"Participants passed a pure-tone hearing screening at 20 dB for octave frequencies between 500 and 8000 Hz (American Speech-Language-Hearing Association, 1997). Moreover, participants evidenced normal nonverbal cognition based on a standard score of at least 75 on the Reynolds Intellectual Assessment Scales (RIAS; Reynolds & Kamphaus, 2003). In addition, none of the children enrolled evidenced si…	"participants evidenced at least five out of 11 CAS features (adapted from Shriberg, Potter, & Strand, 2011) while completing the GFTA-2... If a child evidenced a feature one or more times, it was counted as being positive for that feature, and any combination of five or more features during production of this simple assessment yielded assignment to the CAS group... Operational definitions were c…	1	a, b	CAS-NLI: M= 121.57; Range = 55–207; CAS-LI: M = 114.16, Range: 64–148	0-F 13-M	0	TD = scored above the 16th percentile on the GFTA-2, and exhibited normal language based on a standard Core Language score of 88 or higher on the CELF-4 or a score of “Pass” on the CELF-4 Screening Test. No Hx of communication impairment. SD = "produced fewer than five CAS characteristics and evidenced normal language. In addition, children were excluded from the speech delay group if, per parent…	1	a, b	TD : M = 117.31, Range: 94–212; LI: M = 122.14, Range = 92–144; SD: M = 101.42, Range = 76–119.	TD: 8M, 7F; SD: 4M, 8F; LI: 4M, 3F	0	1	1	0	0	0	0	0	1	1	1	0	1	Perceptual	Perception was measured through a syllable discrimination task composed of synthesized syllable pairs characterized by spectral changes that distinguish place of articulation between /dɑ/–/ɡɑ/.
																																															1
[truncated: 33 more columns]
